# Supplementary material for: A propolis-derived small molecule ameliorates metabolic syndrome in obese mice by targeting the CREB/CRTC2 transcriptional complex
Source: PubMed Central journal article supplement (PMC8752738; doi:10.1038/s41467-021-27533-9), 2022-01-11
Supplement: 41467_2021_27533_MOESM1_ESM.pdf [file 41467_2021_27533_MOESM1_ESM.pdf]

---

# Supplementary Materials

## A Propolis-Derived Small Molecule Ameliorates Metabolic Syndrome in Obese Mice by Targeting the CREB/CRTC2 Transcriptional Complex

Yaqiong Chen<sup>1,8</sup>, Jiang Wang<sup>2,8</sup>, Yibing Wang<sup>2,3</sup>, Pengfei Wang<sup>3,4</sup>, Zan Zhou<sup>3,4</sup>, Rong Wu<sup>3,4</sup>, Qian Xu<sup>5</sup>, Hanyun You<sup>6</sup>, Yaxin Liu<sup>1</sup>, Lei Wang<sup>1</sup>, Lingqin Zhou<sup>1</sup>, Yuting Wu<sup>4</sup>, Lihong Hu<sup>6,9</sup>□, Hong Liu<sup>2,9</sup>□ & Yi Liu<sup>1,7,9</sup>□

<sup>1</sup> Key Laboratory of Metabolism and Molecular Medicine, the Ministry of Education, Department of Biochemistry and Molecular Biology, School of Basic Medical Sciences, Fudan University, 200032 Shanghai, China.

<sup>2</sup> State Key Laboratory of Drug Research and CAS Key Laboratory of Receptor Research, Shanghai Institute of Materia Medica, Chinese Academy of Sciences, 201203 Shanghai, China.

<sup>3</sup> University of Chinese Academy of Sciences, No.19A Yuquan Road, 100049 Beijing, China.

<sup>4</sup> Key Laboratory of Nutrition and Metabolism, Institute for Nutritional Sciences, Shanghai Institutes for Biological Sciences, 200031 Shanghai, China.

<sup>5</sup> Department of Endocrinology, the First Affiliated Hospital of Harbin Medical University, 150081 Heilongjiang Province, China.

<sup>6</sup> Jiangsu Key Laboratory for Functional Substance of Chinese Medicine, School of Pharmacy, Nanjing University of Chinese Medicine, 210023 Nanjing, China.

<sup>7</sup> State Key Laboratory of Medical Neurobiology and MOE Frontiers Center for Brain Science, School of Basic Medical Sciences, Fudan University, 200032 Shanghai, China.

<sup>8</sup> These authors contributed equally: Yaqiong Chen, Jiang Wang.

<sup>9</sup> These authors jointly supervised this work: Lihong Hu, Hong Liu, Yi Liu.

□email: lhhu@njucm.edu.cn; hliu@simm.ac.cn; liuyee@fudan.edu.cn

# Supplementary Fig. 1

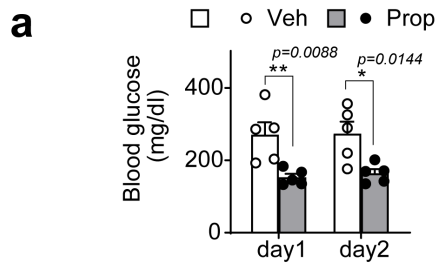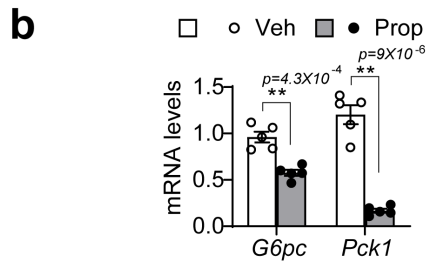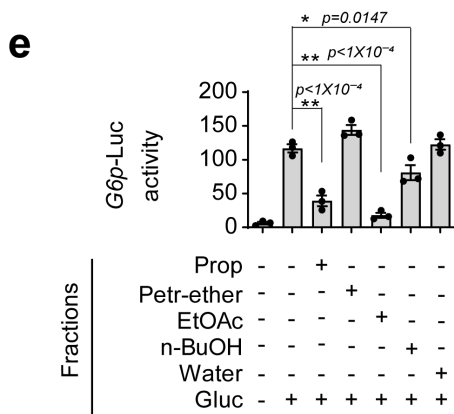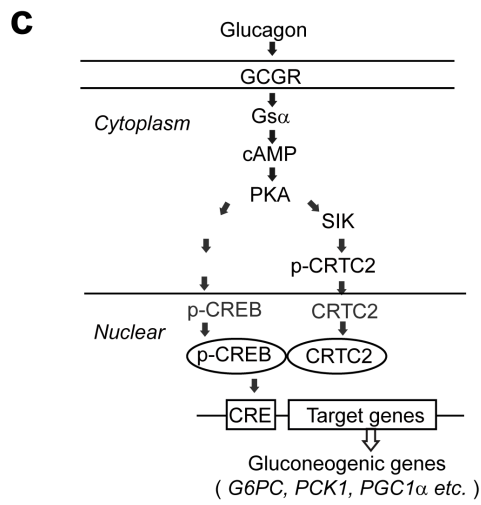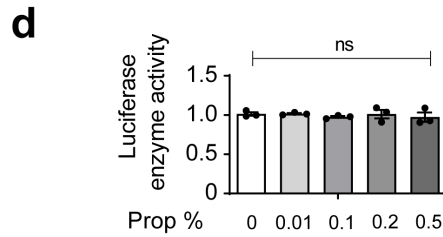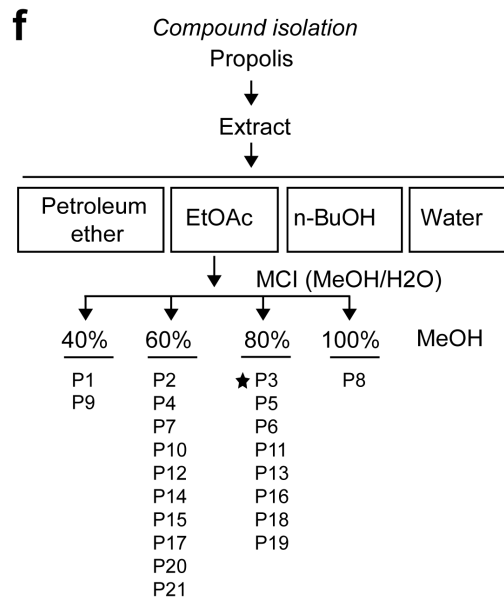

---

1 **Supplementary Figure 1. Identifying inhibitors of gluconeogenesis from Brazilian green propolis**

2 **a)** Measurement of blood glucose levels in 16-h-fasted *db/db* mice administered Brazilian green

3 propolis (250 mg/kg) or vehicle orally one time daily for 2 days. One of three independent

4 experiments presented here. Data are represented as mean  $\pm$  SEM ( $n=5$  per group). \*,  $p < 0.05$ ; \*\*,  $p < 0.01$ ;  $p$  values were determined by two-way ANOVA followed Bonferroni's multiple comparisons

5 test.

6

7 **b)** Quantitative PCR analysis of hepatic gluconeogenic gene expression in *db/db* mice administered

8 propolis (250 mg/kg) or vehicle one time daily orally for 3 weeks. One of two independent

9 experiments presented here. Data are represented as mean  $\pm$  SEM ( $n=5$  per group). \*,  $p < 0.05$ ; \*\*,  $p < 0.01$ ;  $p$  values were determined by unpaired two-tailed multiple  $t$  test with two-stage linear step-up

10 procedure, each gene was analyzed individually, without assuming a consistent SD.

11

12 **c)** Diagram of CREB/CRTC2-mediated gluconeogenic transcription induced by glucagon.

13 **d)** Luciferase enzyme activity. The luciferase enzymatic activity from HEK293T cells incubated

14 with propolis. The cells ectopically expressed luciferase (*CRE-Luc*) and were stimulated with FSK (10

15 nM) for 5 h before lysis, and then incubated with various concentrations of propolis for 30 min before

16 luciferase activity determination. One of two independent experiments presented here. Data are

17 represented as mean  $\pm$  SEM ( $n=3$  per treatment). ns,  $p > 0.05$ ; \*,  $p < 0.05$ ; \*\*,  $p < 0.01$ ;  $p$  values were

18 determined by one-way ANOVA followed Dunnett's multiple comparisons test.

19 **e)** Measure the bio-activity from propolis fractions. The *G6P-Luc* activity in primary hepatocytes

20 treated with propolis (Prop) or indicated propolis fractions for 1-h prior to 6-h stimulation with

21 glucagon (Gluc, 100 nM). The contents of propolis fractions were equal to that in 0.2% propolis. One

---

1 of two independent experiments presented here. Data are represented as mean  $\pm$  SEM ( $n=3$  per  
2 treatment). ns,  $p > 0.05$ ; \*,  $p < 0.05$ ; \*\*,  $p < 0.01$ ;  $p$  values were determined by one-way ANOVA  
3 followed Dunnett's multiple comparisons test.

4 **f)** Flowchart of compound isolation from Brazilian green propolis. P3 indicated by star in  
5 compound list was derived from the EtOAc fraction. Source data for this figure are provided as a  
6 Source data file.

7

# Supplementary Fig. 2

**a**

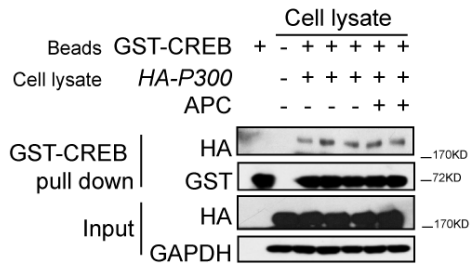

**b**

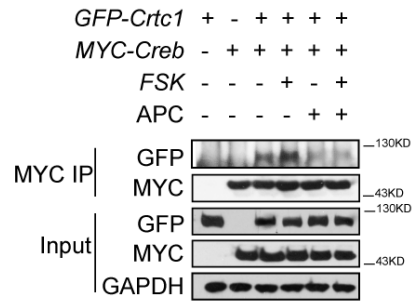

**c**

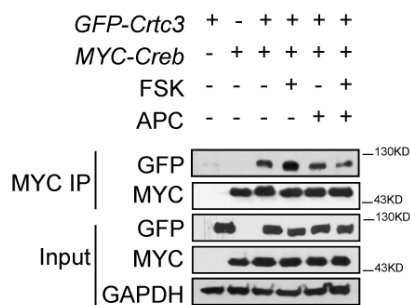

**d**

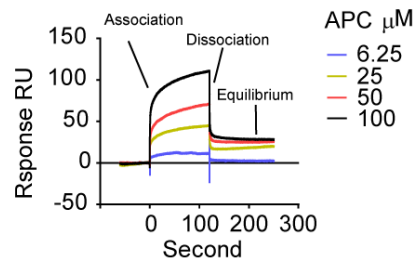

**e**

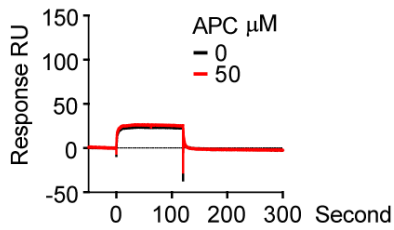

**f**

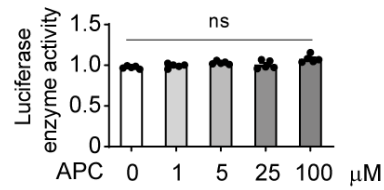

**g**

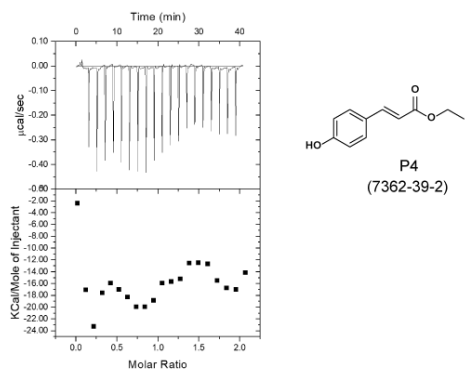

**h**

Two-hybrid assay  
BD-CBP-KIX and AD-CREB-KID

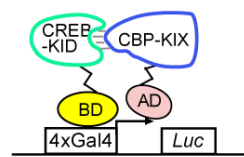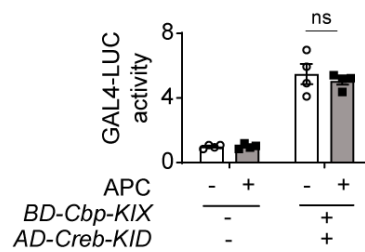

---

1 **Supplementary Figure 2. APC binds with CREB but does not affect CREB-P300 interaction**

2 **a)** Immunoblot of HA-P300 recovered from HEK293T cell lysate using GST-CREB beads. APC

3 (10  $\mu$ M) was incubated with cells for 1-h before FKS (10 nM) stimulation and was included in the

4 following pull-down mixtures ( $n=3$ ). One of two independent experiments presented here.

5 **b)** Immunoblot for recovered GFP-CRTC1 or **(c)** GFP-CRTC3 immunoprecipitated by MYC-CREB

6 from overexpression HEK293T cell line. APC (10  $\mu$ M) was incubated with cells for 1-h before FKS

7 (10 nM) stimulation and was included in the following pull-down mixtures. One of two independent

8 experiments presented here.

9 **d)** SPR sonogram traces of APC binding with HIS-CREB proteins immobilized to NTA-chip. The

10 concentration series of APC was as indicated.

11 **e)** SPR sonogram traces of APC flowing through HIS-CRTC2-S171A proteins immobilized on

12 NTA-chip. The concentration of APC was as indicated.

13 **f)** The luciferase enzymatic activity of HEK293T incubated with APC. Cells over-expressed

14 luciferase CRE-Luc reporter and were stimulated by FSK (10 nM) for 5-h before lysis, which was

15 then incubated with APC (concentration indicated) for 30 min before luciferase activity determination

16 ( $n=3$  per treatment). Data are represented as mean  $\pm$  SEM. \*,  $p < 0.05$ ; \*\*,  $p < 0.01$ ;  $p$  values were

17 determined by one-way ANOVA followed Dunnett's multiple comparisons test.

18 **g)** Isothermal titration calorimetry (ITC) of HIS-CREB protein solution titrated into compound P4,

19  $p$ -Coumaric acid ethyl ester, solution (left).

20 **h)** Reporter activity by two-hybrid assay based on the protein interaction between BD-CREB-KID

21 and AD-CBP-KIX in HEK293T cells incubated with APC (10  $\mu$ M) for 8-h. A schematic diagram of

- 
- 1 this assay is shown at right. Data are represented as mean  $\pm$  SEM. ( $n=4$  per treatment). \*,  $p < 0.05$ ; \*\*,  $p < 0.01$ ;  $p$  values were determined by two-way ANOVA repeated measures followed Bonferroni test.
  - 2
  - 3 Source data for this figure are provided as a Source data file.

### Supplementary Fig. 3

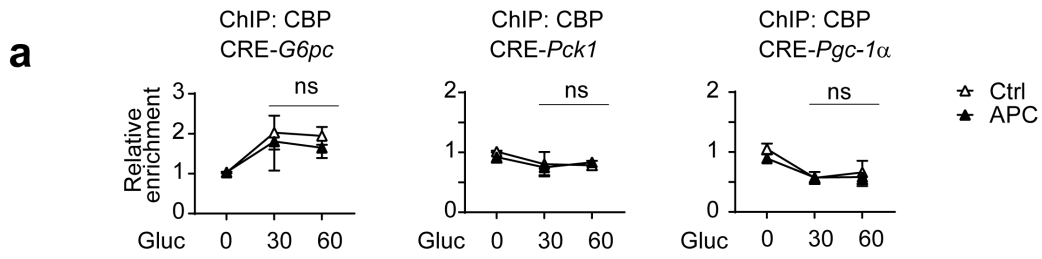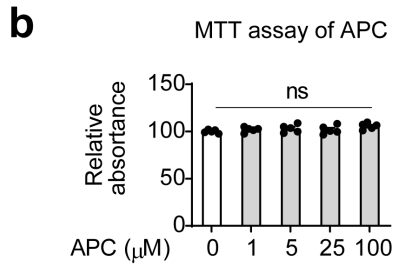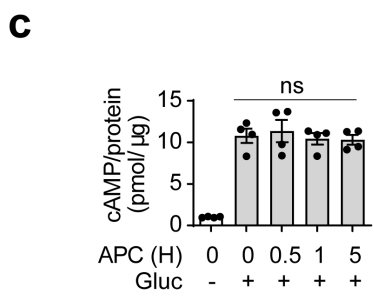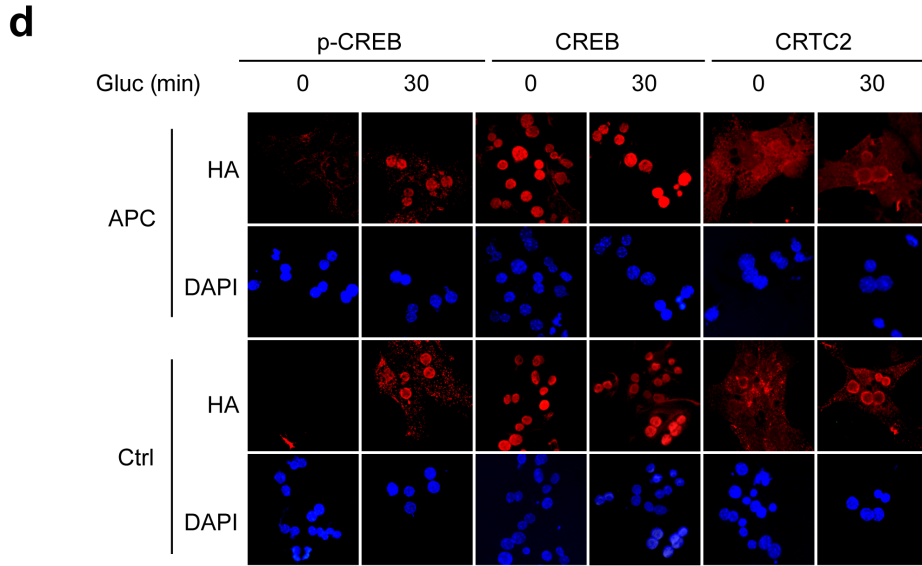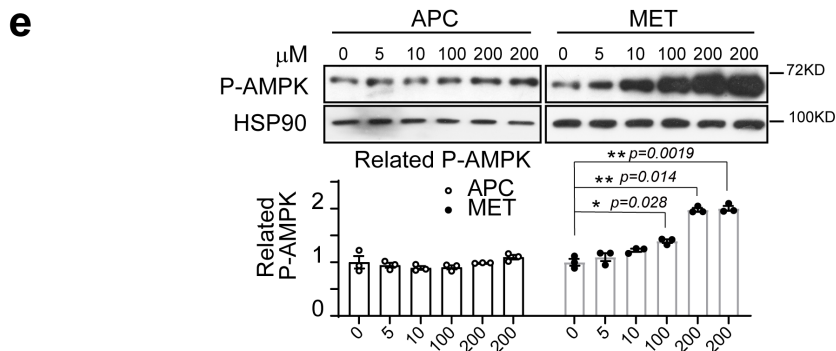

1  
2



---

1 **Supplementary Figure 3. APC inhibits gluconeogenesis independent of CREB-phosphorylation,**  
2 **cell toxin or AMPK activation.**

3 **a)** CBP occupancy over the CRE sites in the promoters of *G6pc*, *Pck1* and *Pgc-1 $\alpha$*  in primary mouse  
4 hepatocytes overexpressing HA-CRTC2. Pretreatment with APC (10  $\mu$ M) for 1-h prior to stimulation  
5 with glucagon (Gluc, 100 nM) for indicated time (0, 30, 60 min). One of three independent experiments  
6 is presented here. Data are represented as mean  $\pm$  SEM ( $n=4$  per treatment). ns,  $p>0.05$ ; \*,  $p < 0.05$ ; \*\*,  
7  $p < 0.01$ ;  $p$  values were determined by two-way ANOVA followed Bonferroni's multiple comparisons  
8 test.

9 **b)** MTT assay with primary hepatocytes exposed to APC (1–100  $\mu$ M) for 48-h ( $n=5$  per treatment).  
10 Data are represented as mean  $\pm$  SEM. ns,  $p>0.05$ ; \*,  $p < 0.05$ ; \*\*,  $p < 0.01$ ;  $p$  values were determined  
11 by one-way ANOVA followed Dunnett's multiple comparisons test.

12 **c)** The cAMP levels of primary hepatocytes exposed to APC (10  $\mu$ M) for indicated times followed  
13 by 30 min stimulation with glucagon (Gluc, 100 nM). The relative cAMP levels were normalized by  
14 total protein concentrations determined by BCA assay ( $n=4$  per treatment). One of three independent  
15 experiments is presented here. ns,  $p>0.05$ ; \*,  $p < 0.05$ ; \*\*,  $p < 0.01$ ;  $p$  values were determined by one-  
16 way ANOVA followed Dunnett's multiple comparisons test.

17 **d)** Immunostaining of Ser133-phosphorylated CREB, CREB and HA-CRTC2 in primary  
18 hepatocytes exposed to APC (10  $\mu$ M) for 1-h prior to 30 min stimulation with glucagon (100 nM).  
19 Nuclei were stained with DAPI. One of three independent experiments is presented here.

20 **e)** Phosphate-AMPK level in primary hepatocytes incubated with APC or metformin (MET) at  
21 indicated concentrations (0–200  $\mu$ M) for 30 minutes (top). Relative P-AMPK normalized by AMPK is

- 
- 1 presented as bar graph (bottom,  $n=3$ ). One of three independent experiments is presented here. ns,
  - 2  $p>0.05$ ; \*,  $p < 0.05$ ; \*\*,  $p < 0.01$ ;  $p$  values were determined by two-way ANOVA followed
  - 3 Bonferroni's multiple comparisons test. Source data for this figure are provided as a Source data file.

# Supplementary Fig. 4

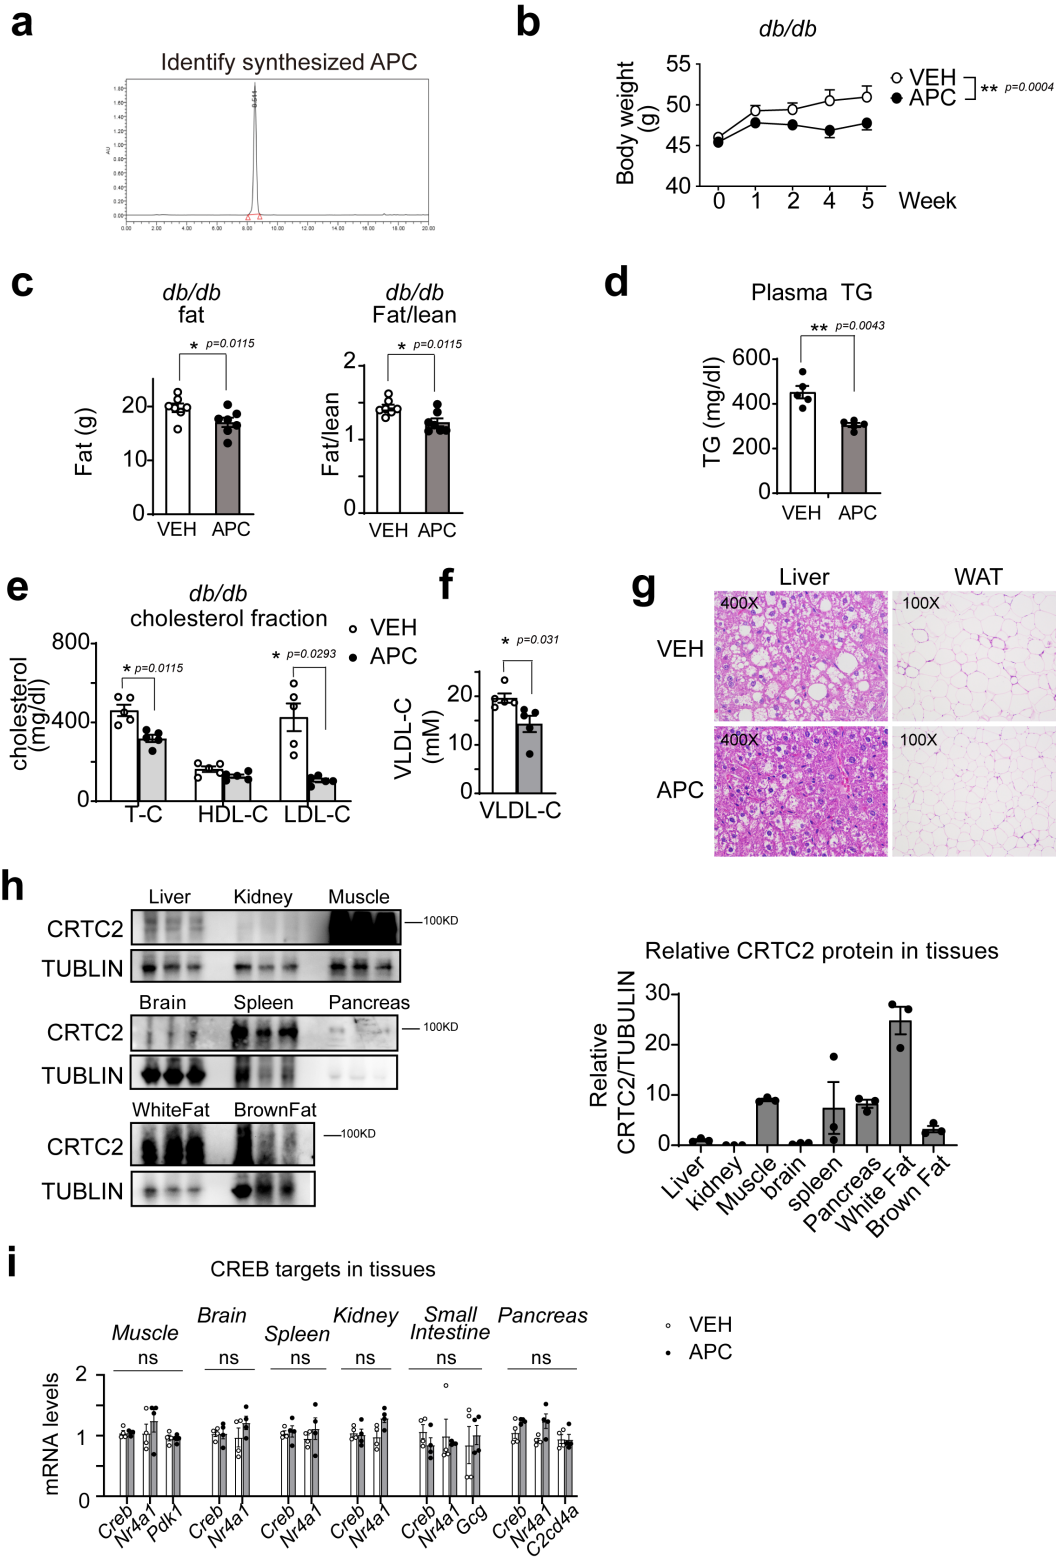

1  
2

---

1 **Supplementary Figure 4. APC improves hypolipidemia in *db/db* mice *in vivo***

2 *db/db* mice were continuously *i.p.* injected with either synthesized APC at indicated doses (APC  
3 20 mg/kg) or vehicle (VEH) one time daily for 5 weeks ( $n = 5-7$ ).

4 **a)** HPLC identification of synthesized APC.

5 **b)** Body weight of these mice. Data are represented as mean  $\pm$  SEM ( $n=6$  per group). \*,  $p < 0.05$ ; \*\*,   
6  $p < 0.01$ ;  $p$  values were determined by two-way ANOVA followed Bonferroni's multiple comparisons  
7 test.

8 **c)** Fat mass (left) and ratio of fat to lean (right) in treated *db/db* mice. Data are represented as  
9 mean  $\pm$  SEM ( $n=7$  per group). \*,  $P < 0.05$ ; \*\*,  $p < 0.01$ ,  $p$  values were determined by unpaired two-  
10 tailed  $t$  test with Welch's correction.

11 **d)** Plasma TG in treated *db/db* mice. Data are represented as mean  $\pm$  SEM ( $n=5$  per group). \*,  
12  $P < 0.05$ ; \*\*,  $p < 0.01$ ,  $p$  values were determined by unpaired two-tailed  $t$  test with Welch's test.

13 **e)** The content of serum total cholesterol (TC), LDL cholesterol (LDL-C), HDL cholesterol (HDL-  
14 C) and **(f)** VLDL cholesterol (VLDL-C) in treated *db/db* mice. Data are represented as mean  $\pm$  SEM  
15 ( $n=5$  per group). \*,  $p < 0.05$ ; \*\*,  $p < 0.01$ ;  $p$  values were determined by two-way ANOVA followed  
16 Bonferroni's multiple comparisons test.

17 **g)** H&E stain of liver and white adipose tissue in treated *db/db* mice. Data are represented as  
18 mean  $\pm$  SEM ( $n=5$  per group). \*,  $P < 0.05$ ; \*\*,  $p < 0.01$ ,  $p$  values were determined by unpaired two-  
19 tailed  $t$  test with Welch's test.

20 **h)** Immunoblotting of endogenous CRT2 in tissues from wild type C57BL6 mice (left), and relative  
21 CRT2 levels normalized by TUBULIN are shown as bar graph (right).

---

1 i) The mRNA levels of CREB target genes in different tissues of male wild C57BL6 mice, which  
2 oral administrated one dose of APC (20 mg/kg) or vehicle after fasting 12-h and for another 6-h  
3 fasting before being sacrificed. Data are represented as mean  $\pm$  SEM ( $n=4$  per group). ns,  $p>0.05$ ; \*,  
4  $P < 0.05$ ; \*\*,  $p < 0.01$ ;  $p$  values were determined by unpaired two-tailed multiple  $t$  test with two-stage  
5 linear step-up procedure, each gene was analyzed individually, without assuming a consistent SD.  
6 Source data for this figure are provided as a Source data file.

## Supplementary Fig. 5

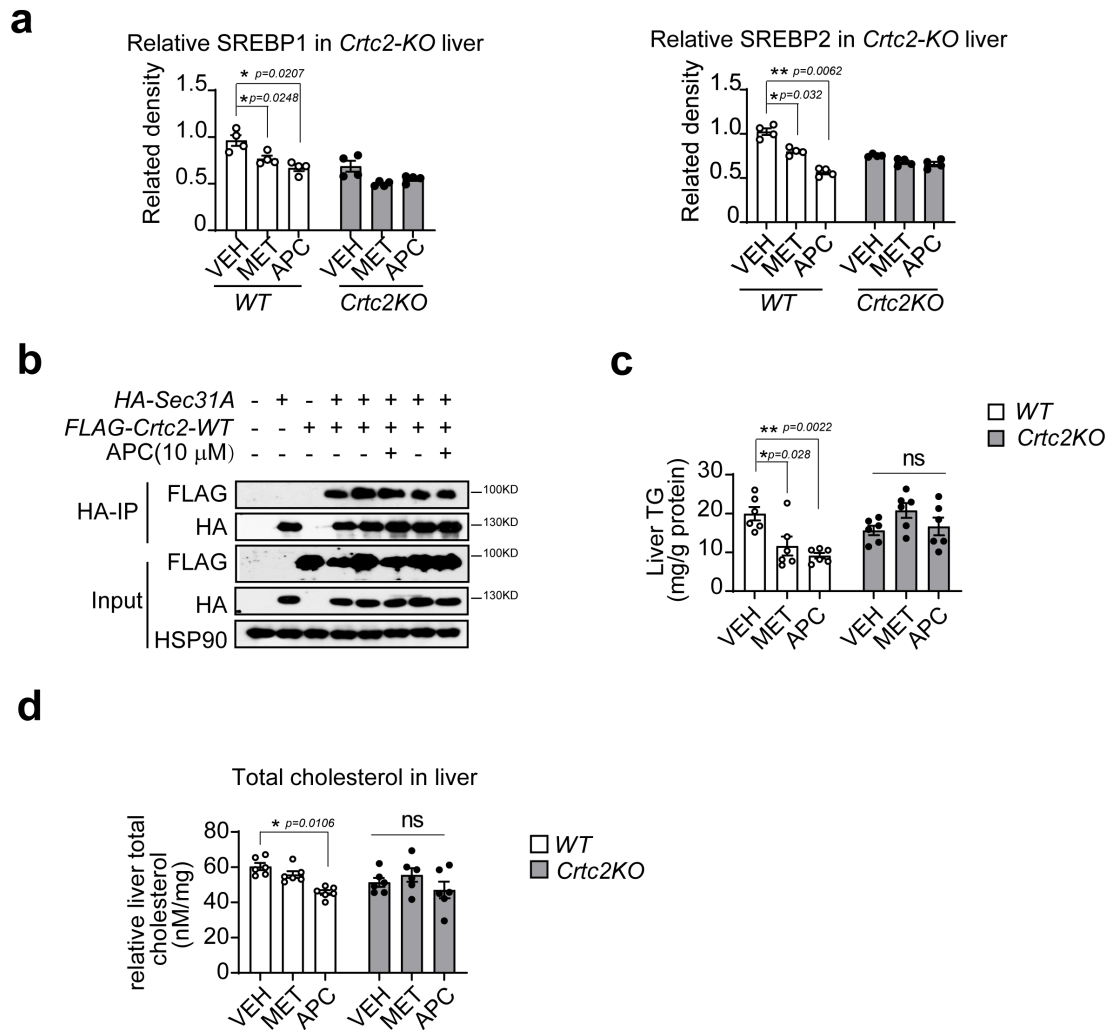

2

3 **Supplementary Figure 5. APC decreases SREBP1 and 2 protein levels but does not impair**

4 **interaction between CRTC2 and SEC31A**

5 **a)** The relative SREBP1 (left) and SREBP2 (right) protein levels in the liver of *Crtc2*KO mice was

6 induced by a high fat diet for 8 weeks. *Crtc2*KO mice and wild type littermates were administrated

7 VEH (vehicle control), MET (metformin, 200 mg/kg) or APC (20 mg/kg) for 3 weeks, and fasted 8 h

8 before anesthesia. Data are represented as mean  $\pm$  SEM ( $n=4$ ). \*,  $p < 0.05$ ; \*\*,  $p < 0.01$ ;  $p$  values were

9 determined by two-way ANOVA followed Bonferroni's multiple comparisons test.

---

1 **b)** Immunoprecipitation of SEC31A from HEK293 cell lysates with overexpressed *HA-Sec13A* or  
2 *FLAG-Crtc2-WT*. APC (10  $\mu$ M) was added to the IP mixture overnight. One of two independent  
3 experiments is shown here.

4 **c)** Triglyceride (TG) concentration and **(d)** total cholesterol levels in the liver of *Crtc2*KO mice  
5 administered MET and APC as in **(a)**. Data are represented as mean  $\pm$  SEM ( $n=6$  per group). \*,  
6  $p < 0.05$ ; \*\*,  $p < 0.01$ ;  $p$  values were determined by two-way ANOVA followed Bonferroni's multiple  
7 comparisons test. Source data for this figure are provided as a Source data file.

## Supplementary Fig. 6

**a**

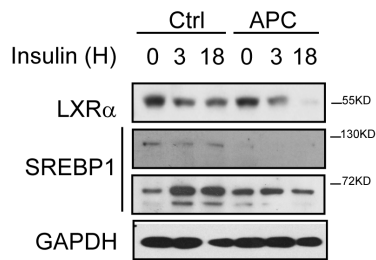

**b**

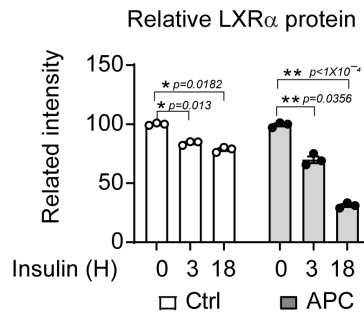

**c**

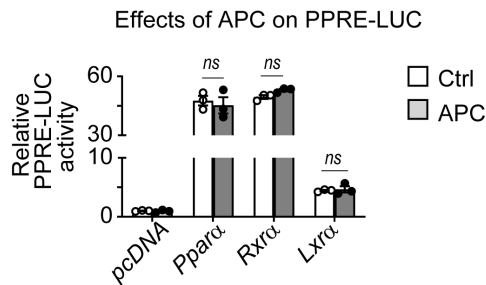

**d**

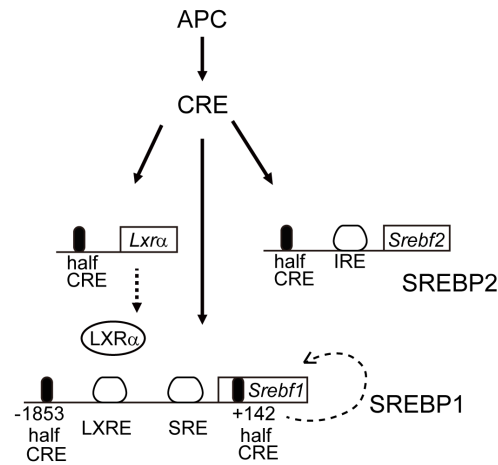

1  
2  
3 **Supplementary Figure 6. APC inhibited transcription induced by half-CRE in the promoters of**  
4 **LXRα and SREBP2.**

5 **a)** Immunoblot of LXRα protein levels in primary hepatocytes stimulated with insulin (100 nM) for  
6 indicated times (0–18 h). One representative result from three experiments is shown here. Relative  
7 LXRα protein level normalized to GAPDH shown as a bar graph **(b)**. Data are represented as  
8 mean ± SEM ( $n=3$  per treatment). \*,  $p < 0.05$ ; \*\*,  $p < 0.01$ ;  $p$  values were determined by two-way  
9 ANOVA repeated measures followed Bonferroni's multiple comparisons test.



---

1 **c)** Luciferase reporter activity of *PPRE-LUC* (PPAR response element driven luciferase reporter) in  
2 HEK293T cell transfected with expression plasmids for *Ppar $\alpha$* , *Rxr $\alpha$*  or *Lxr $\alpha$*  with 8-h incubation of  
3 APC (10  $\mu$ M). One of three independent experiments presented here. Data are represented as  
4 mean  $\pm$  SEM. ( $n=3$  per treatment). \*,  $p < 0.05$ ; \*\*,  $p < 0.01$ ;  $p$  values were determined by two-way  
5 ANOVA followed Bonferroni's multiple comparisons test.

6 **d)** Schematic of APC inhibiting SREBP1 expression via the CRE-LXR $\alpha$ -LXRE axis, and reducing  
7 SREBP2 expression by blocking half-CRE directly. Source data for this figure are provided as a  
8 Source data file.

# Supplementary Fig. 7

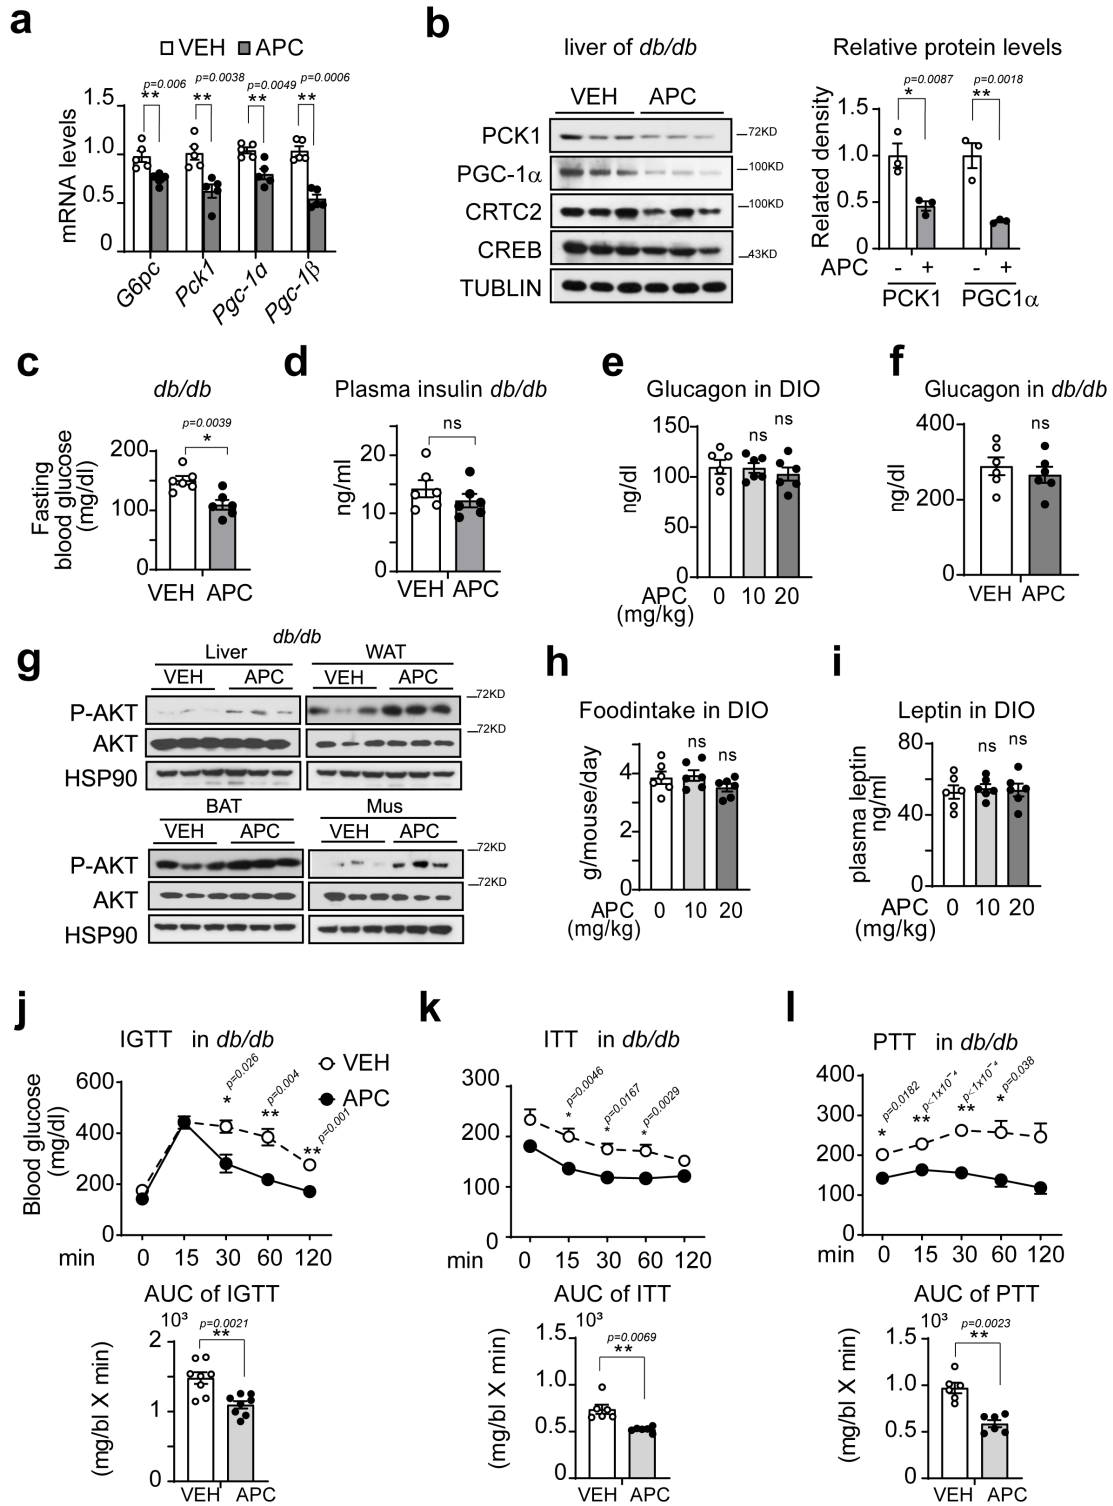

1

2

---

1 **Supplementary Figure 7. APC increases insulin sensitivity in *db/db* mice.**

2 *db/db* mice were continuously *i.p.* injected synthesized APC (20 mg/kg) or control vehicle  
3 (VEH) one time daily for 5 weeks ( $n = 5-7$ ).

4 **a)** Quantitative PCR analysis of *G6pc*, *Pck1*, *Pgc-1 $\alpha$*  and *Pgc-1 $\beta$*  gene expression in the liver of  
5 treated *db/db* mice. Data are represented as mean  $\pm$  SEM ( $n=5$  per group). \*,  $p < 0.05$ ; \*\*,  $p < 0.01$ ;  $p$   
6 values were determined by unpaired two-tailed multiple  $t$  test with two-stage linear step-up  
7 procedure, each gene was analyzed individually, without assuming a consistent SD.

8 **b)** Immunoblotting of endogenous protein levels of PCK1, PGC-1 $\alpha$ , CREB and CRTC2 in the livers  
9 of 16-h-fasted *db/db* mice *i.p.* administered APC (20 mg/kg) or vehicle (VEH) one time daily for 5  
10 weeks. One presentative result from two experiments is shown here (left), and relative PCK1 and  
11 PGC-1 $\alpha$  normalized to TUBULIN levels is presented as a bar graph (right). Data are represented as  
12 mean  $\pm$  SEM ( $n=3$  per treatment). \*,  $p < 0.05$ ; \*\*,  $p < 0.01$ ;  $p$  values were determined by two-way  
13 ANOVA followed Bonferroni's multiple comparisons test.

14 **c)** Fasting blood glucose levels and **(d)** plasma insulin of treated *db/db* mice **(d)** ( $n=6$  per group).  
15 Data are represented as mean  $\pm$  SEM. ns,  $p > 0.05$ ; \*,  $p < 0.05$ ; \*\*,  $p < 0.01$ ;  $p$  values were determined  
16 by unpaired two-tailed  $t$  test with Welch's correction.

17 **e)** Plasma glucagon of DIO mice as in Fig. 7**(d)** and **(f)** glucagon level in treated *db/db* mice. Data  
18 are represented as mean  $\pm$  SEM ( $n=6$  per group). \*,  $p < 0.05$ ; \*\*,  $p < 0.01$ ;  $p$  values were determined by  
19 one-way ANOVA followed Dunnett's test in **(e)**, or by unpaired two-tailed  $t$  test with Welch's  
20 correction in **(f)**.

---

1 **g)** Immunoblotting for phosphorylated AKT and total AKT in tissues from the liver, white adipose  
2 (WAT), brown fat (BAT) and muscle (Mus) of treated *db/db* mice. One representative result from two  
3 experiments is shown here ( $n=3$ ).

4 **h)** Daily food intake and plasma leptin level (**i)** of DIO mice stimulated with high fat diet for 13  
5 weeks and 2 weeks of APC injection ( $n=6$  per group). One of two independent experiments is shown  
6 here. Data are represented as mean  $\pm$  SEM. \*,  $p < 0.05$ ; \*\*,  $p < 0.01$ ;  $p$  values were determined by one-  
7 way ANOVA followed Dunnett's test.

8 **j)** Injected glucose tolerance test (IGTT), (**k)** insulin tolerance test (ITT) and (**l)** pyruvate tolerance  
9 test (PTT) of treated *db/db* mice. The results of area under curve (AUC) are shown at the bottom of  
10 each test curve. Data are represented as mean  $\pm$  SEM ( $n=6-8$  per group). \*,  $p < 0.05$ ; \*\*,  $p < 0.01$ ;  $p$   
11 values of curves were determined by two-way ANOVA followed Bonferroni's multiple comparisons  
12 test, and  $p$  values of AUC were determined by unpaired two-tailed  $t$  test with Welch's correction.

13 Source data for this figure are provided as a Source data file.

## Supplementary Fig.8

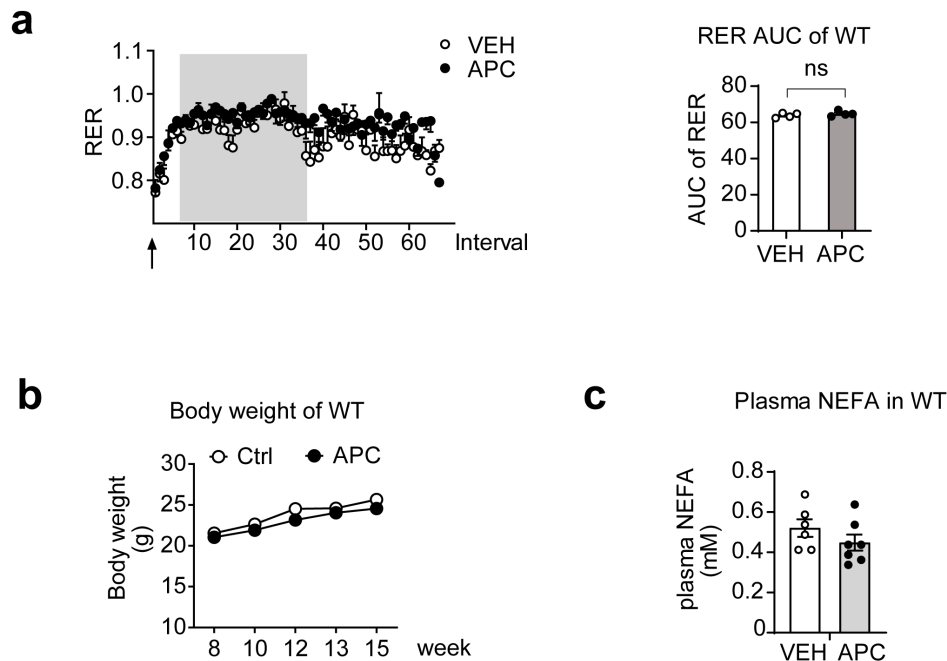

1

2 **Supplementary Figure 8. APC had no impact on lean wild type mice.**

3 Lean mice (wild C57) were *i.p.* injected with APC (20 mg/kg) or vehicle (VEH) one time daily for

4 3 weeks ( $n=7$ ).

5 **a)** Twenty-four hours respiratory exchange ratio (RER), and a time course of RER curves (left) was

6 analyzed by AUC analysis (right) for these lean mice. Data are represented as mean  $\pm$  SEM. ( $n=4$  per

7 group). ns,  $p > 0.05$ ; \*,  $p < 0.05$ ; \*\*,  $p < 0.01$ ;  $p$  values were determined by two-way ANOVA followed

8 Bonferroni's multiple comparisons test, or by unpaired two tailed  $t$ -test with Welch's correction in AUC

9 analysis of RER.

10 **b)** Body weight curves and **(c)** Plasma NEFA in lean mice. One of two independent experiments is

11 shown here. Data are represented as mean  $\pm$  SEM. ( $n=7$  per group). ns,  $p > 0.05$ ; \*,  $p < 0.05$ ; \*\*,  $p < 0.01$ ;  $p$

12 determined by two-way ANOVA followed Bonferroni's multiple comparisons test for **(b)**,

- 
- 1 or by unpaired two tailed  $t$ -test with Welch's test for (c). Source data for this figure are provided as a
  - 2 Source data file.
  - 3

1 **Supplementary Figure 9. Synthesis and identification of A57**

2 **a)** Synthetic route to compound **A57**. (a) malonic acid, piperidine, pyridine, reflux, 92%; (b)  
3 methanol, conc. H<sub>2</sub>SO<sub>4</sub>, argon, reflux, 98%; (c) PhB(OH)<sub>2</sub>, Pd(PPh<sub>3</sub>)<sub>4</sub>, Na<sub>2</sub>CO<sub>3</sub>, toluene-methanol-  
4 water, 80°C, 89%; (d) LiOH, rt, 97%; (e) (*S*)-4-phenyloxazolidin-2-one, pivaloyl chloride, Et<sub>3</sub>N, LiCl,  
5 rt, 90%. (f) (*R*)-4-phenyloxazolidin-2-one, pivaloyl chloride, Et<sub>3</sub>N, LiCl, rt, 89%. (g) (*rac*)-4-  
6 phenyloxazolidin-2-one, pivaloyl chloride, Et<sub>3</sub>N, LiCl, rt, 80%.

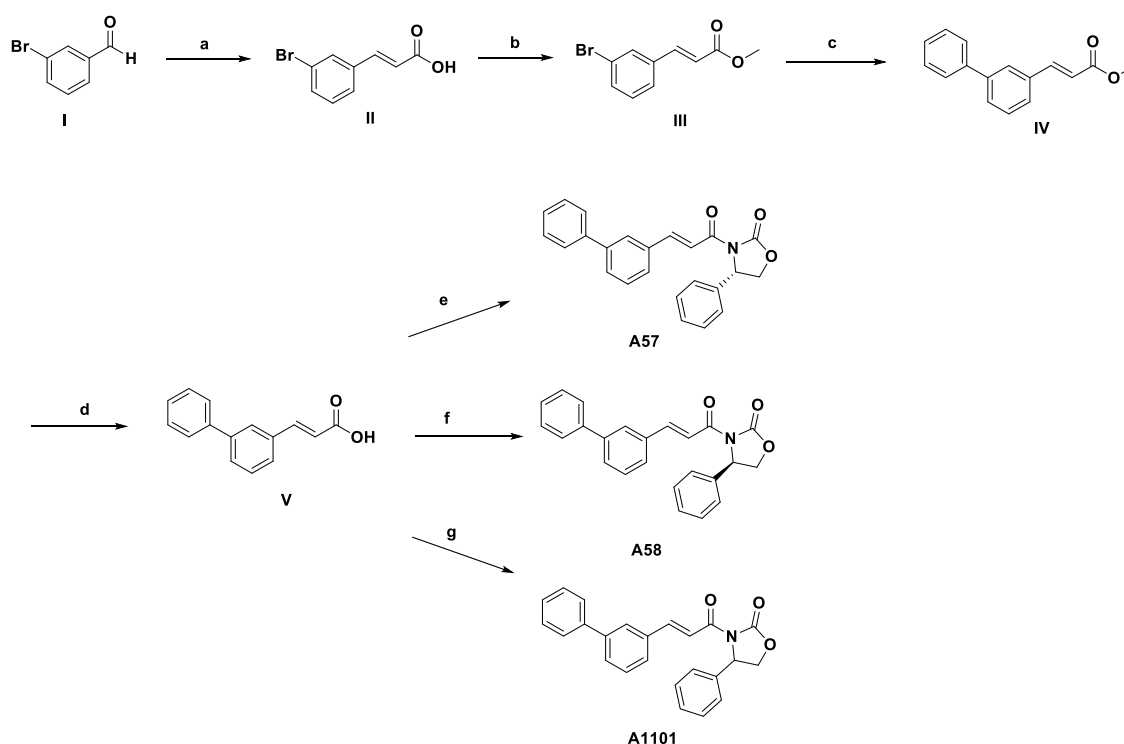

7  
8 **Synthesis compound A57**

9 **Synthesis of (*E*)-3-(3-bromophenyl) acrylic acid II**

10 A suspension of 3-bromobenzaldehyde **I** (1.00 g, 5.40 mmol), malonic acid (2.53 g, 24.32 mmol), and  
11 pyridine-piperidine (70:1, v/v, 70 mL) was heated with reflux for 24 h. After cooling, the mixture was  
12 adjusted to pH 1 by the addition of 1 *N* HCl. The resulting precipitate was collected by filtration, washed  
13 with water, and then dried *in vacuo* to give (*E*)-3-(3-bromophenyl) acrylic acid **II** as colorless crystals

---

1 (1.13 g, 92%). <sup>1</sup>H NMR (400 MHz, DMSO-*d*<sub>6</sub>) δ 12.53 (s, 1H), 7.95 (t, *J* = 1.9 Hz, 1H), 7.72 (d, *J* = 7.8  
2 Hz, 1H), 7.61 (dd, *J* = 7.8, 1.8 Hz, 1H), 7.57 (d, *J* = 16.1 Hz, 1H), 7.38 (t, *J* = 7.9 Hz, 1H), 6.62 (d, *J* =  
3 16.0 Hz, 1H). <sup>13</sup>C NMR (125 MHz, DMSO-*d*<sub>6</sub>) δ 167.8, 142.7, 137.3, 133.2, 131.4, 131.2, 127.6, 122.7,  
4 121.4. ESI/LRMS: (m/z) 224.9, 226.9 [M-H]<sup>-</sup>. ESI/HRMS: (m/z) calcd for C<sub>9</sub>H<sub>6</sub>BrO<sub>2</sub> [M-H]<sup>-</sup> 224.9557,  
5 yielded 224.9555.

6

### 7 Synthesis of methyl (*E*)-3-(3-bromophenyl) acrylate **III**

8 Acrylic acid **II** (1.00 g, 4.40 mmol) and anhydrous methanol (25 mL) were added to a dried round  
9 flask, followed by the dropwise addition of concentrated sulfuric acid (0.26 mL, 4.84 mmol). The  
10 resulting mixture was charged and protected with argon and refluxed overnight. The reaction mixture  
11 was allowed to cool to room temperature. After the solvent was removed *in vacuo*, the residue was  
12 added to EtOAc and H<sub>2</sub>O, and the phases were separated. The aqueous layer was extracted again with  
13 EtOAc, then the combined organic layers were washed with H<sub>2</sub>O, Na<sub>2</sub>CO<sub>3</sub> (aq.), and brine, dried over  
14 Na<sub>2</sub>SO<sub>4</sub>, filtered and then the solvent was removed *in vacuo* to afford methyl (*E*)-3-(3-bromophenyl)  
15 acrylate **III** as a colorless solid (1.04 g, 98%). <sup>1</sup>H NMR (400 MHz, DMSO-*d*<sub>6</sub>) δ 7.98 (ddd, *J* = 9.1,  
16 3.7, 1.9 Hz, 1H), 7.78 – 7.70 (m, 1H), 7.68 – 7.57 (m, 2H), 7.37 (tdd, *J* = 7.5, 5.0, 2.3 Hz, 1H), 6.79 –  
17 6.68 (m, 1H), 3.73 (d, *J* = 1.6 Hz, 3H).

18

### 19 Synthesis of methyl (*E*)-3-([1,1'-biphenyl]-3-yl) acrylate **IV**

20 A mixture of phenylboronic acid (424.8 mg, 3.48 mmol), sodium carbonate (527.6 mg, 4.98 mmol),  
21 and methyl (*E*)-3-(3-bromophenyl) acrylate **III** (600.0 mg, 2.49 mmol) in toluene (6 mL), MeOH (3



---

1 mL) and water (6 mL) was added to tetrakis-(triphenylphosphine) palladium (86.3 mg, 0.75 mmol) at  
2 room temperature. The resulting mixture was heated to 80°C with stirring for 10 h under an argon  
3 atmosphere. Then the reaction mixture was cooled to room temperature and extracted with EtOAc.  
4 The extract was dried over Na<sub>2</sub>SO<sub>4</sub>, and concentrated. The residue was purified by silica gel column  
5 chromatography (hexane: EtOAc = 30: 1) to give methyl (*E*)-3-([1,1'-biphenyl]-3-yl) acrylate **IV** as a  
6 white powder (528.5 mg, 89%). <sup>1</sup>H NMR (400 MHz, DMSO-*d*<sub>6</sub>) δ 8.04 (d, *J* = 2.0 Hz, 1H), 7.79 –  
7 7.72 (m, 5H), 7.56 – 7.46 (m, 3H), 7.43 – 7.37 (m, 1H), 6.80 (dd, *J* = 16.1, 0.9 Hz, 1H), 3.75 (s, 3H).  
8 <sup>13</sup>C NMR (125 MHz, CDCl<sub>3</sub>) δ 166.9, 143.1, 136.5, 133.1, 130.7, 130.4, 126.7, 123.0, 119.3, 51.8.  
9 EI/LRMS: (m/z) 240. EI/HRMS: (m/z) calcd for C<sub>10</sub>H<sub>9</sub>O<sub>2</sub>Br 239.9780, found 239.9784.

10

#### 11 Synthesis of (*E*)-3-([1,1'-biphenyl]-3-yl) acrylic acid **V**

12 Acrylate **IV** (500.0 mg, 2.10 mmol) was dissolved in MeOH-H<sub>2</sub>O (1:1, v/v), then LiOH (100.5 mg,  
13 4.20 mmol) was added, and the resulting mixture was stirred at room temperature overnight. After  
14 completion, 15 mL of heptane was added to the reaction mixture with 15 min stirring. Then the phases  
15 were separated, and the aqueous layer was adjusted to pH 4 by the addition of a 10% citric acid  
16 aqueous solution. The resulting precipitate was collected by filtration, washed with water, and then  
17 dried *in vacuo* to give (*E*)-3-([1,1'-biphenyl]-3-yl) acrylic acid **V** as a white powder (456.4 mg,  
18 97%). <sup>1</sup>H NMR (400 MHz, DMSO-*d*<sub>6</sub>) δ 12.42 (s, 1H), 7.99 (d, *J* = 2.2 Hz, 1H), 7.78 – 7.66 (m, 5H),  
19 7.55 – 7.46 (m, 3H), 7.43 – 7.37 (m, 1H), 6.68 (d, *J* = 16.1 Hz, 1H). <sup>13</sup>C NMR (125 MHz, DMSO-*d*<sub>6</sub>)  
20 δ 167.6, 143.8, 140.8, 139.4, 134.9, 129.5, 128.9 (2CH), 128.4, 127.7, 127.0, 126.8 (2CH), 126.6,

---

1 119.7. ESI/LRMS: (m/z) 223.1 [M-H]<sup>-</sup>. ESI/HRMS: (m/z) calcd for C<sub>15</sub>H<sub>11</sub>O<sub>2</sub> [M-H]<sup>-</sup> 223.0765, found  
2 223.0763.

3

4

5 Synthesis of (*S,E*)-3-(3-([1,1'-biphenyl]-3-yl)acryloyl)-4-phenyloxazolidin-2-one **A57**

6 The acrylic acid **V** (400.0 mg, 1.78 mmol), Et<sub>3</sub>N (0.62 mL, 4.46 mmol) and anhydrous dichloromethane  
7 were added to a dried flask, and the solution was stirred under an argon atmosphere at -78°C, and  
8 pivaloyl chloride (0.33 mL, 2.68 mmol) was then added. The resulting mixture was allowed to warm to  
9 room temperature and stirred for 1 h. Then, the reaction mixture was cooled to -5°C, and (*S*)-4-  
10 phenyloxazolidin-2-one (291.1 mg, 1.78 mmol) and LiCl (75.6 mg, 1.78 mmol) were added. The  
11 resulting mixture was warmed to room temperature and stirred overnight. After completion, the reaction  
12 mixture was quenched by water and extracted with dichloromethane, the organic layer was washed with  
13 brine, dried over Na<sub>2</sub>SO<sub>4</sub>, and concentrated *in vacuo*. The residue was purified by silica gel column  
14 chromatography (DCM: MeOH = 200: 1) to give (*S,E*)-3-(3-([1,1'-biphenyl]-3-yl)acryloyl)-4-  
15 phenyloxazolidin-2-one **A57** as a white powder (595.7 mg, yield 90%, chemical purity 99.7%, *ee* >  
16 99.9%). m.p. 138.6-140.2 °C, [α]<sub>D</sub><sup>20</sup> = -6 (c 0.100 g/100mL, CHCl<sub>3</sub>), <sup>1</sup>H NMR (400 MHz, DMSO-*d*<sub>6</sub>) δ  
17 8.00 – 7.88 (m, 2H), 7.81 – 7.66 (m, 5H), 7.56 (t, *J* = 7.7 Hz, 1H), 7.53 – 7.47 (m, 2H), 7.45 – 7.33 (m,  
18 6H), 5.61 (dd, *J* = 8.6, 3.9 Hz, 1H), 4.87 – 4.78 (m, 1H), 4.27 – 4.20 (m, 1H). <sup>13</sup>C NMR (125 MHz,  
19 DMSO-*d*<sub>6</sub>) δ 164.0 (C=O), 153.9 (O-C=O), 144.5 (HC=), 141.0 (C-1'), 139.7 (C-1), 139.4 (C-1 of (*S*)-  
20 Phenyl), 134.9 (C-3), 129.7 (C-2), 129.0 (C-5, C-3', C-5'), 128.8 (C-3 and C-5 of (*S*)-Phenyl), 128.0  
21 (C-6), 127.8 (C-4'), 127.0 (C-4 of (*S*)-Phenyl), 126.8 (C-2', C-6'), 126.7 (C-4), 125.85 (C-2 and C-6 of

---

1 (S)-Phenyl), 118.2 (=CH), 70.2 (CH<sub>2</sub>-O), 57.2 (CH-N). ESI/LRMS: (*m/z*) 370.1 [M+H]<sup>+</sup>, 391.9  
2 [M+Na]<sup>+</sup>. ESI/HRMS: (*m/z*) calcd for C<sub>24</sub>H<sub>20</sub>NO<sub>3</sub><sup>+</sup> [M+H]<sup>+</sup> 370.1438, found 370.1448. The chemical  
3 purity was determined by HPLC with an Agilent Extend-C18 column (5 μm, 4.6×150 mm) (MeOH/H<sub>2</sub>O  
4 = 70/30, λ = 254 nm, 1.0 mL/min), purity 99.7%, t = 26.339 min. The *ee* value was determined by HPLC  
5 with a Chiralpak IA column (*n*-hexane/*i*-PrOH = 70/30, λ = 254 nm, 1.0 mL/min), t<sub>major</sub> = 15.400 min,  
6 *ee* > 99.9%.

### 7 **Synthesis of the compound A58**

#### 8 **Synthesis of (*R,E*)-3-(3-([1,1'-biphenyl]-3-yl)acryloyl)-4-phenyloxazolidin-2-one A58**

9 The compound **A58**, (*R,E*)-3-(3-([1,1'-biphenyl]-3-yl)acryloyl)-4-phenyloxazolidin-2-one, was  
10 prepared from **V** and (*R*)-4-phenyloxazolidin-2-one according to the procedure described for compound  
11 **A57** in 89% yield as a white powder, chemical purity 99.5%, *ee* > 99.9%. [α]<sub>D</sub><sup>20</sup> = +6 (c 0.100 g/100mL,  
12 CHCl<sub>3</sub>), <sup>1</sup>H NMR (400 MHz, DMSO-*d*<sub>6</sub>) δ 7.96 – 7.89 (m, 2H), 7.81 – 7.67 (m, 5H), 7.56 (t, *J* = 7.7 Hz,  
13 1H), 7.50 (dd, *J* = 8.2, 6.9 Hz, 2H), 7.44 – 7.32 (m, 6H), 5.61 (dd, *J* = 8.6, 3.9 Hz, 1H), 4.82 (t, *J* = 8.7  
14 Hz, 1H), 4.23 (dd, *J* = 8.6, 3.9 Hz, 1H). <sup>13</sup>C NMR (125 MHz, DMSO-*d*<sub>6</sub>) δ 164.0 (C=O), 153.9 (O-  
15 C=O), 144.5 (HC=), 141.0 (C-1'), 139.7 (C-1), 139.4 (C-1 of (*R*)-Phenyl), 134.9 (C-3), 129.7 (C-2),  
16 129.0 (C-5, C-3', C-5'), 128.8 (C-3 and C-5 of (*R*)-Phenyl), 128.0 (C-6), 127.8 (C-4'), 127.0 (C-4 of  
17 (*R*)-Phenyl), 126.8 (C-2', C-6'), 126.7 (C-4), 125.85 (C-2 and C-6 of (*R*)-Phenyl), 118.2 (=CH), 70.2  
18 (CH<sub>2</sub>-O), 57.2 (CH-N). LRMS (ESI, *m/z*): 370.1 [M+H]<sup>+</sup>, 391.9 [M+Na]<sup>+</sup>; HRMS (ESI) calcd for  
19 C<sub>24</sub>H<sub>19</sub>NNaO<sub>3</sub> [M+Na]<sup>+</sup>: 392.1257, found: 392.1264. The chemical purity was determined by HPLC  
20 with an Agilent Extend-C18 column (5 μm, 4.6×150 mm) (MeOH/H<sub>2</sub>O = 80/20, λ = 254 nm, 1.0

---

1 mL/min), purity 99.0%,  $t = 6.543$  min. The  $ee$  value was determined by HPLC with a Chiralpak IA  
2 column ( $n$ -hexane/ $i$ -PrOH = 70/30,  $\lambda = 254$  nm, 1.0 mL/min),  $t_{\text{major}} = 51.571$  min,  $ee > 99.9\%$ .

### 3 **Synthesis of the compound A1101**

#### 4 Synthesis of (*rac,E*)-3-(3-([1,1'-biphenyl]-3-yl)acryloyl)-4-phenyloxazolidin-2-one **A1101**

5 The compound **A1101**, (*rac,E*)-3-(3-([1,1'-biphenyl]-3-yl)acryloyl)-4-phenyloxazolidin-2-one, was  
6 prepared from **V** and (*rac*)-4-phenyloxazolidin-2-one according to the procedure described for  
7 compound **A57** in 80% yield as a white powder, chemical purity 99.0%,  $ee = 0.1\%$ .  $^1\text{H NMR}$  (500 MHz,  
8 DMSO- $d_6$ )  $\delta$  7.95 – 7.86 (m, 2H), 7.81 – 7.65 (m, 5H), 7.57 (t,  $J = 7.7$  Hz, 1H), 7.50 (dd,  $J = 8.3$ , 7.1  
9 Hz, 2H), 7.45 – 7.30 (m, 6H), 5.61 (dd,  $J = 8.7$ , 3.9 Hz, 1H), 4.82 (t,  $J = 8.7$  Hz, 1H), 4.23 (dd,  $J = 8.7$ ,  
10 3.9 Hz, 1H).  $^{13}\text{C NMR}$  (125 MHz, DMSO- $d_6$ )  $\delta$  164.0 (C=O), 153.9 (O-C=O), 144.5 (HC=), 141.0 (C-  
11 1'), 139.7 (C-1), 139.4 (C-1 of (*rac*)-Phenyl), 134.9 (C-3), 129.7 (C-2), 129.0 (C-5, C-3', C-5'), 128.8  
12 (C-3 and C-5 of (*rac*)-Phenyl), 128.0 (C-6), 127.8 (C-4'), 127.0 (C-4 of (*rac*)-Phenyl), 126.8 (C-2', C-  
13 6'), 126.7 (C-4), 125.85 (C-2 and C-6 of (*rac*)-Phenyl), 118.2 (=CH), 70.2 (CH<sub>2</sub>-O), 57.2 (CH-N).  
14 LRMS (ESI,  $m/z$ ): 370.1 [M+H]<sup>+</sup>, 391.9 [M+Na]<sup>+</sup>; HRMS (ESI) caclcd for C<sub>24</sub>H<sub>20</sub>NO<sub>3</sub> [M+H]<sup>+</sup>: 370.1438,  
15 found: 370.1445. The chemical purity was determined by HPLC with an Agilent Extend-C18 column  
16 (5  $\mu\text{m}$ , 4.6 $\times$ 150 mm) (MeOH/H<sub>2</sub>O = 80/20,  $\lambda = 254$  nm, 1.0 mL/min), purity 100.0%,  $t = 6.274$  min.  
17 The  $ee$  value was determined by HPLC with a Chiralpak IA column ( $n$ -hexane/ $i$ -PrOH = 70/30,  $\lambda = 254$   
18 nm, 1.0 mL/min),  $t_1 = 15.481$  min,  $t_2 = 50.245$  min,  $ee = 0.1\%$ .

19

1

2 **b)  $^1\text{H}$  NMR spectrum of compound A57, A58 and A1101**

3  $^1\text{H}$  NMR spectrum of compound A57 (400 MHz, DMSO- $d_6$ )

4

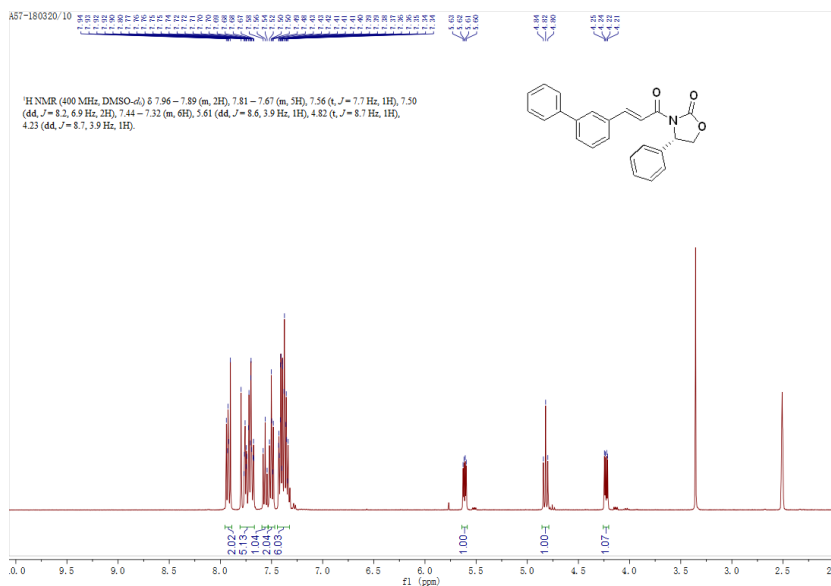

5

6  $^1\text{H}$  NMR spectrum of the compound A58 (400 MHz, DMSO- $d_6$ )

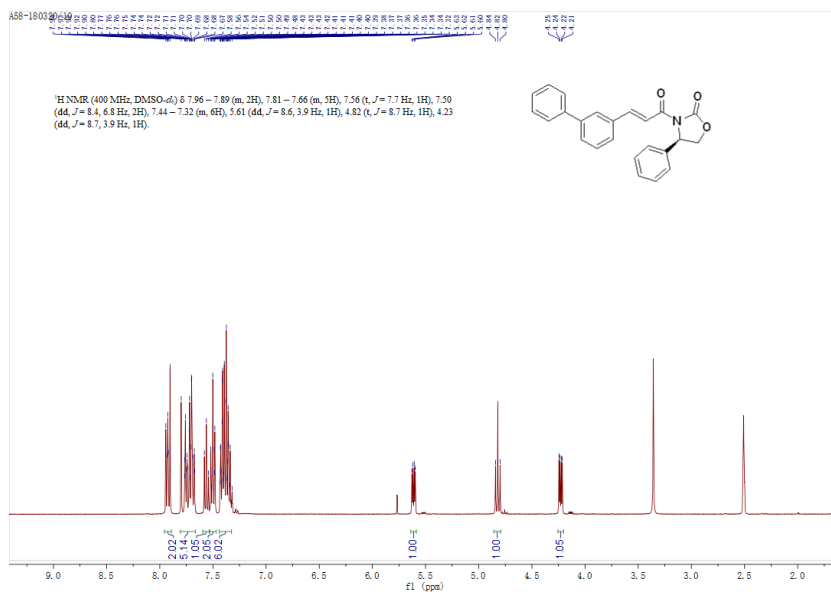

7

8

9

10

11

1  
2

<sup>1</sup>H NMR spectrum of the compound **A1101** (500 MHz, DMSO-*d*<sub>6</sub>)

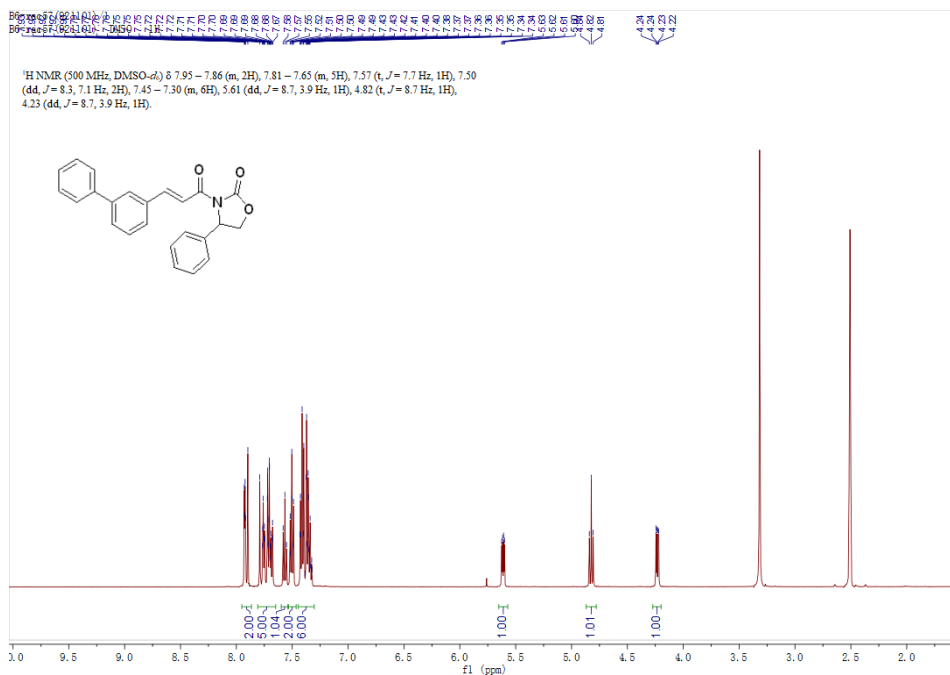

3  
4  
5  
6  
7  
8  
9  
10  
11  
12  
13  
14  
15  
16  
17  
18

1 c)  $^{13}\text{C}$  NMR spectrum of compound **A57**, **A58** and **A1101**

2  $^{13}\text{C}$  NMR spectrum of compound **A57** (125 MHz,  $\text{DMSO-}d_6$ )

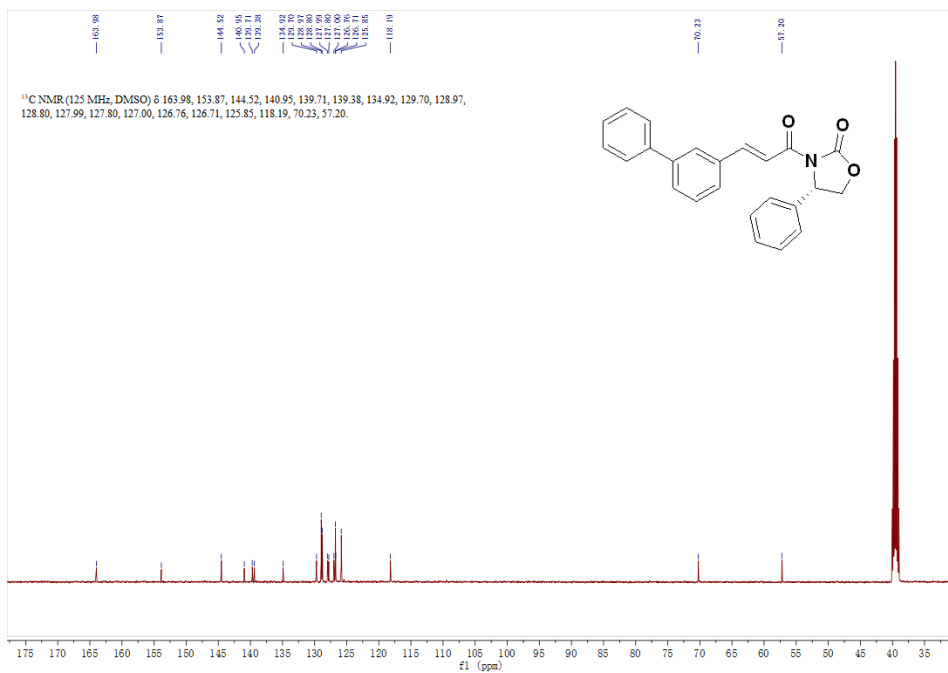

3

4  $^{13}\text{C}$  NMR spectrum of the compound **A58** (125 MHz,  $\text{DMSO-}d_6$ )

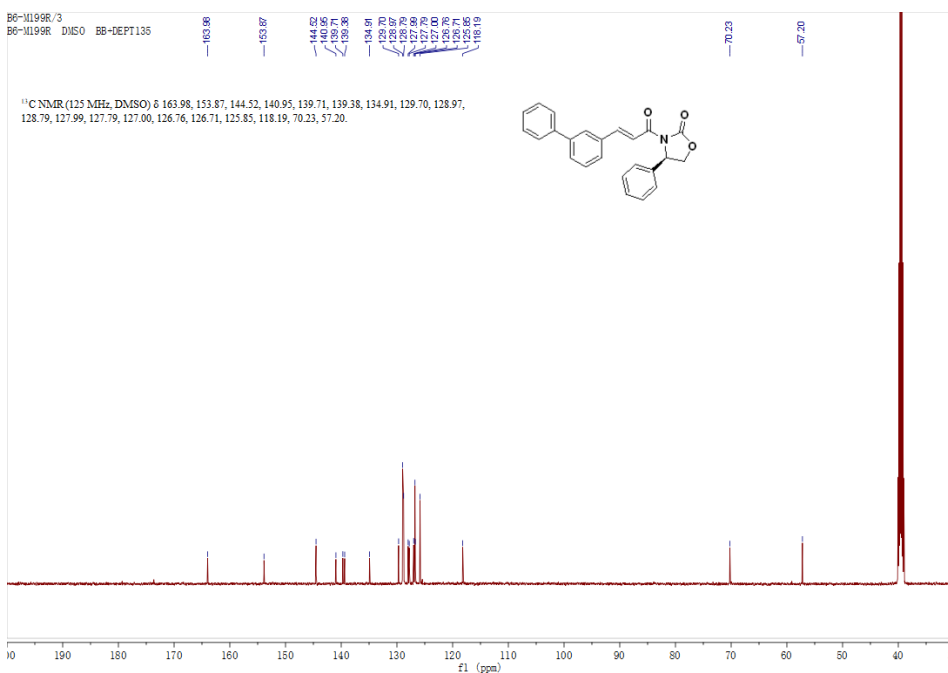

5

6

7

8

1 <sup>13</sup>C NMR spectrum of the compound **A1101** (125 MHz, DMSO-*d*<sub>6</sub>)

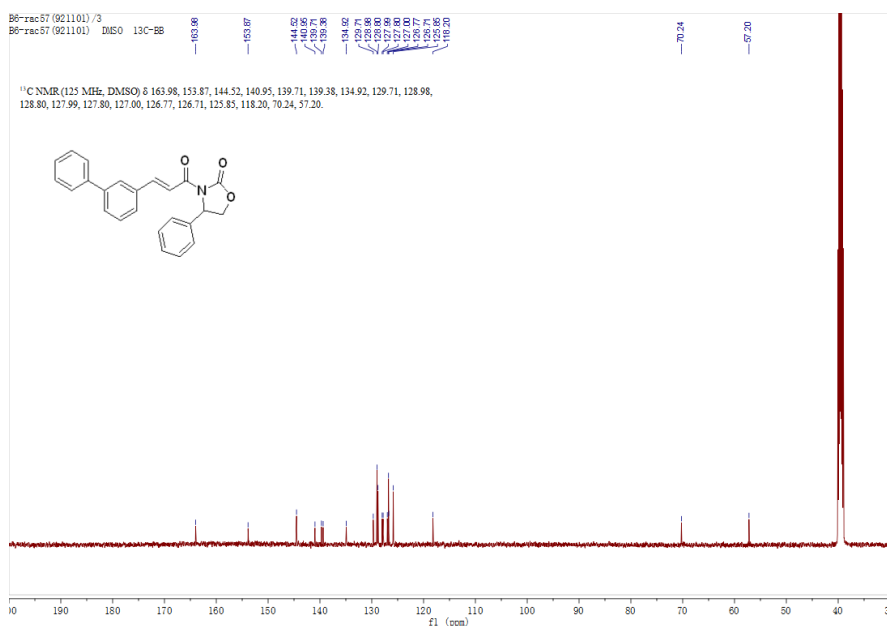

2  
3  
4 **d)** HPLC spectrum of compound **A57**, **A58** and **A1101** (chemical purity determination)  
5 Method A: Agilent Extend-C18 column (5 μm, 4.6×150 mm) (MeOH/H<sub>2</sub>O = 70/30, λ = 254 nm, 1.0  
6 mL/min), **A57** purity 99.7%.

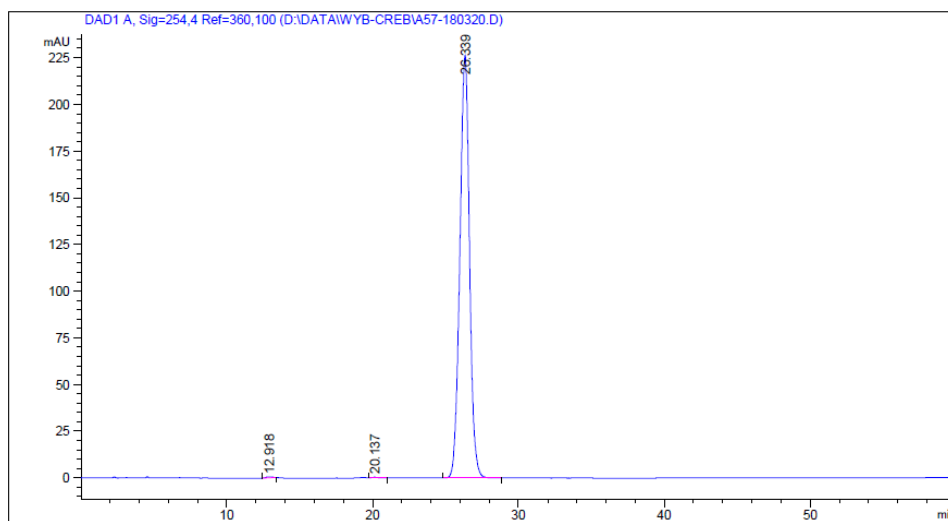

| Peak #          | RetTime [min] | Type | Width [min] | Area [mAU*s]     | Height [mAU]     | Area %  |
|-----------------|---------------|------|-------------|------------------|------------------|---------|
| 1               | 12.918        | BB   | 0.4412      | 15.57250         | 5.14396e-1       | 0.1493  |
| 2               | 20.137        | VB   | 0.4645      | 14.09288         | 4.29803e-1       | 0.1351  |
| 3               | 26.339        | BB   | 0.7044      | 1.04006e4        | 226.20932        | 99.7156 |
| <b>Totals :</b> |               |      |             | <b>1.04303e4</b> | <b>227.15352</b> |         |

8  
9  
10  
11 HPLC spectrum of the compound **A58** (chemical purity determination)



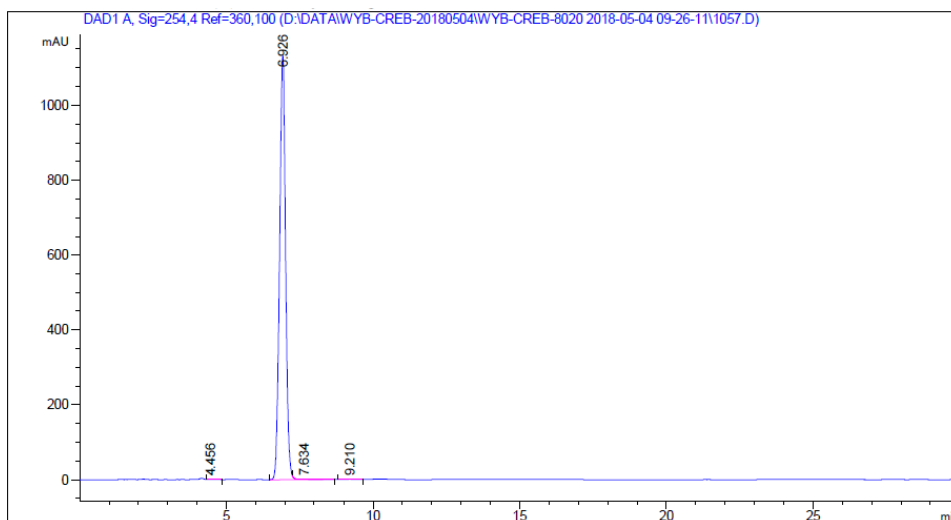

Signal 1: DAD1 A, Sig=254,4 Ref=360,100

| Peak # | RetTime [min] | Type | Width [min] | Area [mAU*s] | Height [mAU] | Area %  |
|--------|---------------|------|-------------|--------------|--------------|---------|
| 1      | 4.456         | VB   | 0.1615      | 10.42765     | 9.84879e-1   | 0.0642  |
| 2      | 6.926         | BV R | 0.2204      | 1.61569e4    | 1133.11365   | 99.5074 |
| 3      | 7.634         | VB E | 0.3716      | 51.74415     | 1.96258      | 0.3187  |
| 4      | 9.210         | BB   | 0.3027      | 17.80532     | 8.85208e-1   | 0.1097  |

Totals : 1.62369e4 1136.94632

HPLC spectrum of the compound **A58** Method B: Agilent Extend-C18 column (5  $\mu$ m, 4.6 $\times$ 150 mm)  
 (MeOH/H<sub>2</sub>O = 80/20,  $\lambda$  = 254 nm, 1.0 mL/min), **A58** purity 99.5%.

5  
6  
7  
8  
9  
10  
11  
12  
13  
14

1  
2 HPLC spectrum of the compound **A1101** (chemical purity determination)

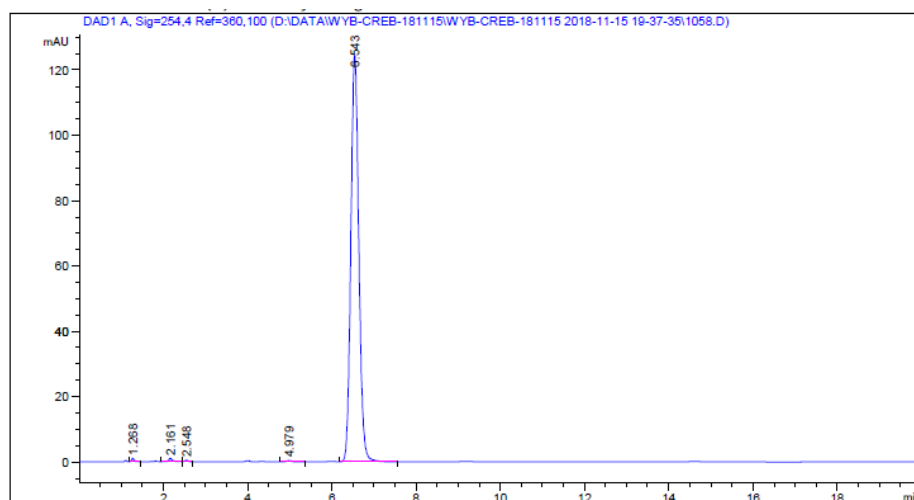

3  
Signal 1: DAD1 A, Sig=254,4 Ref=360,100

| Peak # | RetTime [min] | Type | Width [min] | Area [mAU*s] | Height [mAU] | Area %  |
|--------|---------------|------|-------------|--------------|--------------|---------|
| 1      | 1.268         | VV R | 0.0674      | 4.69879      | 1.01277      | 0.2845  |
| 2      | 2.161         | VV R | 0.0872      | 6.37240      | 1.01949      | 0.3858  |
| 3      | 2.548         | VB   | 0.0846      | 2.37255      | 4.15400e-1   | 0.1436  |
| 4      | 4.979         | BB   | 0.1381      | 2.68904      | 3.01236e-1   | 0.1628  |
| 5      | 6.543         | BB   | 0.2035      | 1635.71960   | 124.32829    | 99.0234 |

4  
Totals : 1651.85237 127.07719

5  
6 HPLC spectrum of the compound **A1101** Method B: Agilent Extend-C18 column (5  $\mu$ m, 4.6 $\times$ 150  
7 mm) (MeOH/H<sub>2</sub>O = 80/20,  $\lambda$  = 254 nm, 1.0 mL/min), **A1101** purity 100.0%

8  
9 **(E)** The configuration of compounds **A57** (**A**) and **A58** (**B**).

10 The *S*-configured enantiomer **A57** (IC<sub>50</sub> = 0.74  $\mu$ M) was more effective than the *R*-configured compound  
11 **A58** (IC<sub>50</sub> = 73.5  $\mu$ M) and the racemate **A1101** (IC<sub>50</sub> = 3.56  $\mu$ M). These results suggest that the  
12 configuration of the phenyl group is related to the inhibitory activity. The configuration of compounds  
13 **A57** and **A58** was shown in suppl. Fig. 9e. The different configuration of the phenyl group in these two  
14 compounds explains why compound **A57** has better inhibitory activity than **A58**. For the *S*-configured  
15 compound **A57**, phenyl group in compound **A57** may occupy the active pocket of protein CREB, which  
16 increase the inhibitory activity. Consistent with the poorer inhibitory activity to CREB/CRTC2

---

1 interaction, compound **A58** exhibits a different configuration. It is possible that the steric bulk of the  
2 phenyl group in compound **A58** hinder interaction between the compound **A58** and the protein CREB,  
3 which reduced the inhibitory activity.

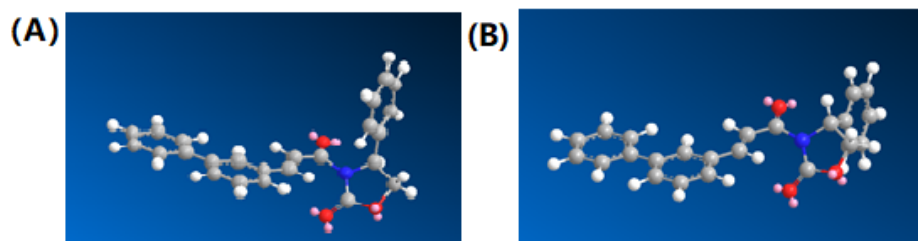

4  
5  
6

**Sup. Figure 9e.** The configuration of compounds **A57 (A)** and **A58 (B)**.

# Supplementary Fig.10

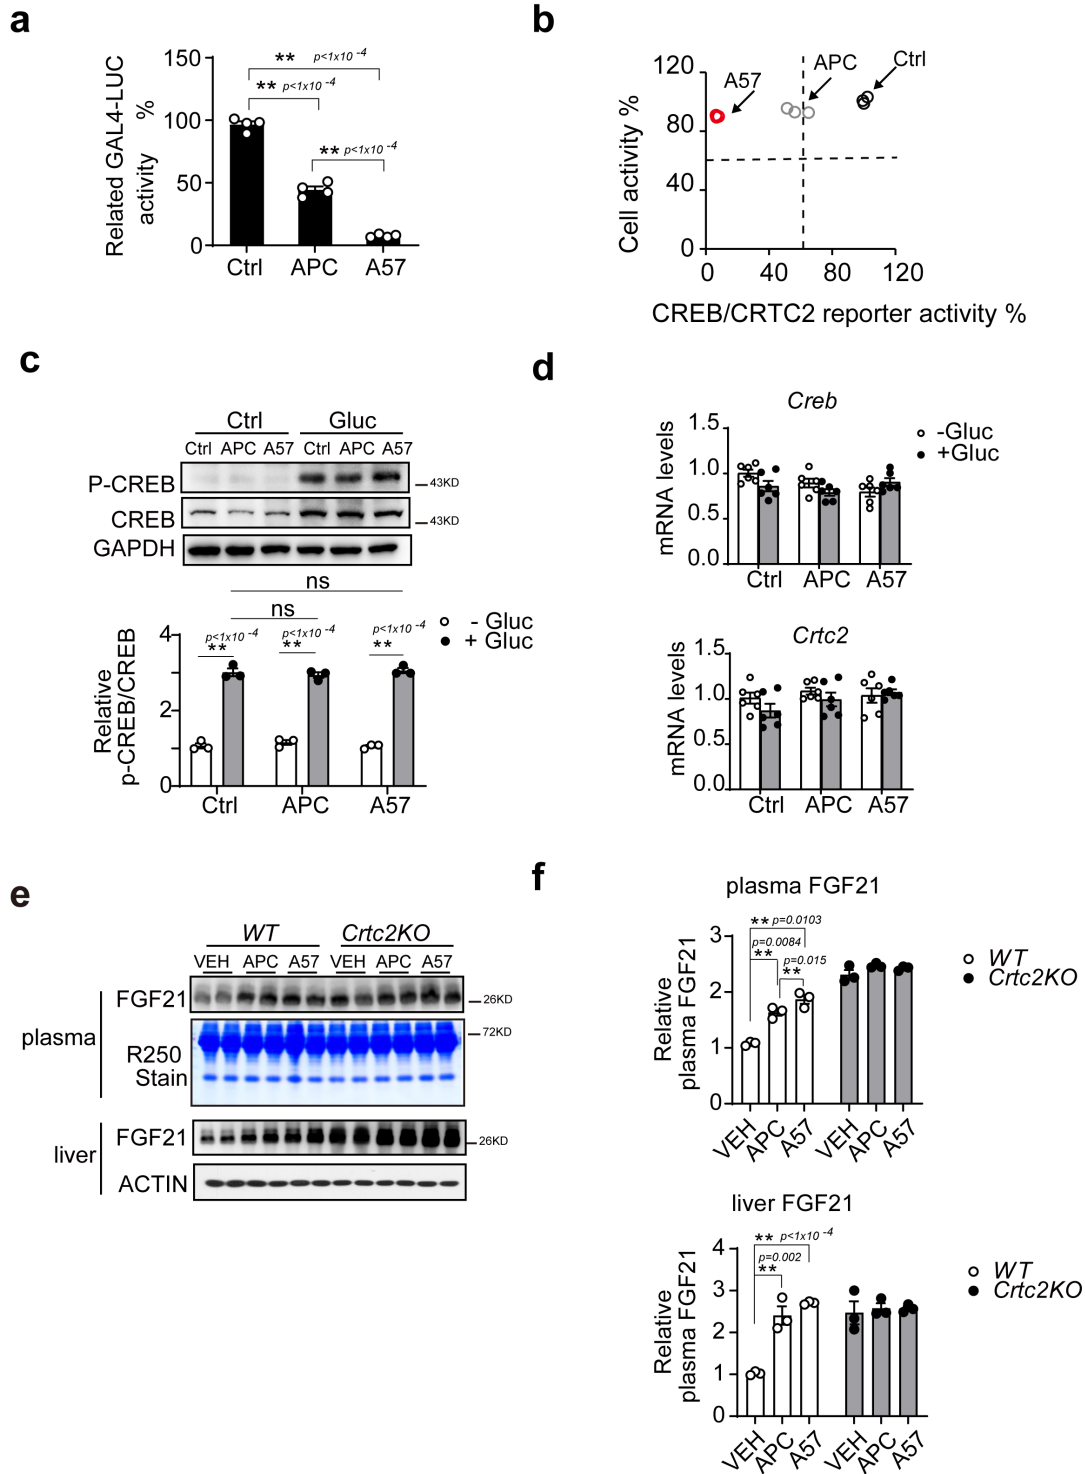

---

1 **Supplementary Figure 10. A57 is novel inhibitor of the CREB/CRTC2 protein complex.**

2 **a)** The inhibitory-activity of **A57** as determined by two-hybrid reporter assay. HEK293T cells were  
3 co-transfected with CREB/CRTC2 two-hybrid reporter system plasmids, following incubation with  
4 indicated small molecules (10  $\mu$ M) overnight before luciferase reporter assays ( $n=4$  per treatment).  
5 One of three independent experiments is shown here. Data are represented as mean  $\pm$  SEM. \*,  
6  $p < 0.05$ ; \*\*,  $p < 0.01$ ;  $p$  values were determined by one-way ANOVA followed Dunnett's multiple  
7 comparisons test.

8 **b)** Combinatorial analysis of the cell toxicity and inhibitory activity of **A57**. The CREB/CRTC2-two  
9 hybrid reporter activity (as a normalized percentage) is the X-axis, and the cell activity tested by MTT  
10 assay (as a normalized percentage) is the Y-axis.  $n=3$ .

11 **c)** Immunoblot of P-CREB and CRTC2 de-phosphorylation in primary hepatocytes incubated with  
12 **A57** and APC (10  $\mu$ M) 1-h prior to glucagon (100 nM) stimulation for 30 min. One result from three  
13 experiments is shown here (top), and relative P-CREB normalized by CREB is presented as a bar  
14 graph (bottom,  $n=3$ ). Data are represented as mean  $\pm$  SEM. ns,  $p > 0.05$ ; \*,  $p < 0.05$ ; \*\*,  $p < 0.01$ ;  $p$   
15 values were determined by two-way ANOVA followed Bonferroni's multiple comparisons test.

16 **d)** mRNA levels of *Creb* (top) and *Crtc2* (bottom) in primary hepatocytes incubated with **A57**  
17 (10  $\mu$ M) 1-h prior to glucagon (100 nM) stimulation for 4-h ( $n=6$  per treatment). Data are represented  
18 as mean  $\pm$  SEM. ns,  $p > 0.05$ ; \*,  $p < 0.05$ ; \*\*,  $p < 0.01$ ;  $p$  values were determined by two-way ANOVA  
19 followed Bonferroni's multiple comparisons test.

20 **e)** Immunoblotting of plasma and liver FGF21 protein in *Crtc2*KO mice, which induced by a high  
21 fat diet for 13 weeks then orally administered APC (20 mg/kg), **A57** (20 mg/kg) or vehicle (VEH) for

---

1 3 weeks. Two technological repeats present a composite pool including 5 mice per group. One  
2 representative result from three-independent experiments is shown here.

3 **f)** Relative plasma FGF21 (top) and liver FGF21 (bottom), normalized by R250 signaling or  
4 ACTIN respectively, is shown here as a bar graph. Data are represented as mean  $\pm$  SEM ( $n=5$  per  
5 group, two technological repeats present a composite pool). ns,  $p > 0.05$ ; \*,  $p < 0.05$ ; \*\*,  $p < 0.01$ ;  $p$   
6 values were determined by two-way ANOVA followed Tukey's multiple comparisons test. Source data  
7 for this figure are provided as a Source data file.

8

1 **Supplementary Table 1. Primers for Quantitative PCR analysis**

| <b>Gene Name</b> | <b>Forward primer</b>   | <b>Reverse primer</b>     | <b>Organism</b> |
|------------------|-------------------------|---------------------------|-----------------|
| <i>Acc</i>       | TGACAGACTGATCGCAGAGAAAG | TGGAGAGCCCCACACACA        | mouse           |
| <i>Acl</i>       | GCCAGCGGGAGCACATC       | CTTTGCAGGTGCCACTTCATC     | mouse           |
| <i>Acox1</i>     | TTTGTTGTCCCTATCCGTGAGA  | CCGATATCCCCAACAGTGATG     | mouse           |
| <i>Acox2</i>     | CATCCAACGTGACCCAGTGTT   | AAATGCGTTCAGGACCGTCTT     | mouse           |
| <i>Acs1l</i>     | CGCACCCCTTCCAACCAACA    | CGTATTTCCACTGACTGCAT      | mouse           |
| <i>ApoB</i>      | CGTGGGCTCCAGCATTCTA     | TCACCAGTCATTTCTGCCTTTG    | mouse           |
| <i>ApoE</i>      | GCTGGGTGCAGACGCTTT      | TGCCGTCAGTTCTTGTGTGACT    | mouse           |
| <i>Atgl</i>      | ATGTTCCCGAGGGAGACCAA    | GAGGCTCCGTAGATGTGAGTG     | mouse           |
| <i>Cebpa</i>     | GCGGGAACGCAACAACATC     | GTCACTGGTCAACTCCAGCAC     | mouse           |
| <i>Cel</i>       | CGCCTGGAGGTTCTATTTCTTG  | TCCACGAAACCGCCTTCTG       | mouse           |
| <i>Cpt1a</i>     | CGGAGACGACGCTTTCGAC     | CGTAGTTGGAAGTACACCAGGA    | mouse           |
| <i>Creb</i>      | GTCCAGGCTCTCTATCATCTC   | ATAGGCATCAAGACGGCAGAA     | mouse           |
| <i>Crtc2</i>     | CACCAGAACTTGACCCACTGT   | CACAGGGGTCACTCAGCATAG     | mouse           |
| <i>Fasn</i>      | GCTGCGGAAACTTCAGGAAAT   | AGAGACGTGTCACTCCTGGACTT   | mouse           |
| <i>G6pc</i>      | TCTGTCCCGGATCTACCTTG    | GTAGAATCCAAGCGCGAAAC      | mouse           |
| <i>Glut4</i>     | AACTGGTCCCTAGCTGTATTCT  | CCAGCCACGTTGCATTGTA       | mouse           |
| <i>Hmgcl</i>     | CCGGCATCAACTACCCAGTC    | GCGCTGGAAACTCTCCTCTAT     | mouse           |
| <i>Hmgcs</i>     | GCCGTGAACTGGGTGCGAA     | GCATATATAGCAATGTCTCCTGCAA | mouse           |
| <i>Hsl</i>       | TGGCACACCATTTTGACCTG    | TTGCGGTTAGAAGCCACATAG     | mouse           |
| <i>Insig1</i>    | TCACAGTGACTGAGCTTCAGCA  | TCATCTTCATCACACCCAGGAC    | mouse           |
| <i>Insig2b</i>   | CCGGGCAGAGCTCAGGAT      | GAAGCAGACCAATGTTTCAATGG   | mouse           |
| <i>L32</i>       | TCTGGTGAAGCCCAAGATCG    | CTCTGGGTTTCCGCCAGTT       | mouse           |
| <i>Ldlr</i>      | GAGGAACTGGCGGCTGAA      | GTGCTGGATGGGGAGGTCT       | mouse           |
| <i>Lipg</i>      | ATGCGAAACACGGTTTTCTG    | GGACGCAAGGTTGTGATACTTC    | mouse           |
| <i>Lpl</i>       | TTGCCCTAAGGACCCCTGAA    | TTGAAGTGGCAGTTAGACACAG    | mouse           |
| <i>Lxra</i>      | ACAGAGCTTCGTCCACAAAAG   | GCGTGCTCCCTTGATGACA       | mouse           |
| <i>Mgll</i>      | AGGCGAACTCCACAGAATGTT   | ACAAAAGAGGTACTGTCCGTCT    | mouse           |
| <i>Mttp</i>      | ATACAAGCTCACGTACTCCACT  | TCTCTGTTGACCCGCATTTTC     | mouse           |
| <i>Pck1</i>      | GTGCTGGAGTGGATGTTCCG    | CTGGCTGATTCTCTGTTTCAGG    | mouse           |
| <i>Pcsk9</i>     | ACCTCATAGGCCTGGAGTT     | CTGTGATGACCTCTGGAGCA      | mouse           |
| <i>Pgc1a</i>     | TGCAAGACCGTGGTGCCACC    | TCCTCGGCTGAGCCCTGAGG      | mouse           |
| <i>Pgc1b</i>     | AGCTGCTTCTGTCTGTGAGTTCC | AAGGGGCGATGGGTGACGGA      | mouse           |
| <i>Ppara</i>     | TCTGTGGGCTCACTGTTCT     | AGGGCTCATCCTGTCTTTG       | mouse           |
| <i>Pparg</i>     | GGCTGAGGAGAAGTCACACTCTG | AAATCTTGTCTGTACACAGTCCTG  | mouse           |
| <i>Retn</i>      | TCTCCTCCAGAGGGAAGTTGG   | TTTCTTCACGAATGTCCCACG     | mouse           |
| <i>Rxra</i>      | ATGGACACCAAACATTTCTGTC  | CCAGTGGAGAGCCGATTCC       | mouse           |
| <i>Scap</i>      | ATTTGCTCACCGTGGAGATGTT  | GAAGTCATCCAGGCCACTACTAATG | mouse           |

|                 |                        |                            |       |
|-----------------|------------------------|----------------------------|-------|
| <i>Scd1</i>     | CCGGAGACCCCTTAGATCGA   | TAGCCTGTAAAAGATTTCTGCAAACC | mouse |
| <i>Srebf-1a</i> | GGCCGAGATGTGCGAACT     | TTGTTGATGAGCTGGAGCATGT     | mouse |
| <i>Srebf-1c</i> | GCGGAGCCATGGATTGCAC    | CTCTTCCTTGATAACCAGGCC      | mouse |
| <i>Srebf-2</i>  | GCGTTCTGGAGACCATGGA    | ACAAAGTTGCTCTGAAAACAAATCA  | mouse |
| <i>Ucp1</i>     | AGGCTTCCAGTACCATTAGGT  | CTGAGTGAGGCAAAGCTGATTT     | mouse |
| <i>Ucp2</i>     | CAGCGCCAGATGAGCTTTG    | GGAAGCGGACCTTTACCACA       | mouse |
| <i>Ucp3</i>     | CTGCACCGCCAGATGAGTTT   | ATCATGGCTTGAAATCGGACC      | mouse |
| <i>Tnfaip2</i>  | AGGAGGAGTCTGCGAAGAAGA  | GGCAGTGGACCATCTAACTCG      | mouse |
| <i>Pdk1</i>     | TCACAGATTTTGGAAACAGCAA | TGAGCAGCTCTGGAGAAACA       | mouse |
| <i>C2cd4a</i>   | CTCTTGCGGGACCGAGATG    | GGTCTGGAGTGAGCACGTT        | mouse |
| <i>Gcg</i>      | TGAATGAAGACAAACGCCACT  | CCACTGCACAAAATCTTGGGC      | mouse |

1  
2



---

1 **Supplementary Table 2. Primers for CHIP-QPCR analysis**

2

| <b>Primer name</b>           | <b>Detect site</b> | <b>Organism</b> | <b>Usage</b> | <b>Sequence</b>           |
|------------------------------|--------------------|-----------------|--------------|---------------------------|
| CRE- <i>G6pc</i> -F          | CRE                | Mouse           | CHIP         | GGAGGGCAGCCTCTAGCACTGTCAA |
| CRE- <i>G6pc</i> -R          | CRE                | Mouse           | CHIP         | TCAGTCTGTAGGTCAATCCAGCCCT |
| CRE- <i>Pck1</i> -F          | CRE                | Mouse           | CHIP         | TCTCCCTGGAGTTTATTGTG      |
| CRE- <i>Pck1</i> -R          | CRE                | Mouse           | CHIP         | TACTATATAGAAGGGAGGACAGC   |
| CRE- <i>Pgcl</i> $\alpha$ -F | CRE                | Mouse           | CHIP         | GGTTTAGAGTTGGTGGCATT      |
| CRE- <i>Pgcl</i> $\alpha$ -R | CRE                | Mouse           | CHIP         | CACCTGTCTTACTACAGTCCC     |
| CRE- <i>Lxr</i> $\alpha$ -F  | Half CRE           | Mouse           | CHIP         | ATGGGAAGACAAACCACTAAA     |
| CRE- <i>Lxr</i> $\alpha$ -R  | Half CRE           | Mouse           | CHIP         | AACGCAGGGAGGGCTAT         |
| LXRE- <i>Srebpl</i> -F       | LXRE               | Mouse           | CHIP         | CTTGCTGCTGCCATTCG         |
| LXRE- <i>Srebpl</i> -F       | LXRE               | Mouse           | CHIP         | GGTTTCTCCCGGTGCT          |

3

4

1 **Supplementary Table 3. The antibody, plasmids and other materials used in this work**

| Type       | Name                                      | Provider                                                  | Note   |
|------------|-------------------------------------------|-----------------------------------------------------------|--------|
| Antibodies | Rabbit anti-CREB                          | Cell Signal Technology (CST, #9197)                       | 1:1000 |
| Antibodies | Rabbit anti-CRTC2 pAb (454-607)           | Merck (ST1099)                                            | 1:8000 |
| Antibodies | Rabbit anti-HISTON H3                     | Abcam (ab1791)                                            | 1:2000 |
| Antibodies | Rabbit anti-HISTON H3K27ac                | Abcam (ab4729)                                            | 1:2000 |
| Antibodies | Rabbit anti-CBP (D6C5)                    | Cell Signal Technology (CST, #7389)                       | 1:2000 |
| Antibodies | Rabbit anti-SREBP1 (2A4)                  | Santa Cruze (sc-13551)                                    | 1:2000 |
| Antibodies | mouse anti-SREBP2                         | BD Biosciences (557037)                                   | 1:2000 |
| Antibodies | Rabbit anti-AMPK $\alpha$ (D5A2)          | Cell Signal Technology (CST, #5831S)                      | 1:2000 |
| Antibodies | Rabbit anti-P-Thr172-AMPK $\alpha$ (40H9) | Cell Signal Technology (CST, #2535S)                      | 1:2000 |
| Antibodies | Rabbit anti-HSP90(4F10)                   | Santa Cruze (sc-69703)                                    | 1:2000 |
| Antibodies | Rabbit anti-LXR $\alpha$                  | Abcam (ab190727)                                          | 1:2000 |
| Antibodies | Rabbit anti-RXR $\alpha$                  | Cell Signal Technology (CST, #3085)                       | 1:2000 |
| Antibodies | Rabbit anti-PPAR $\alpha$                 | CAYMAN Chemical Company (041071)                          | 1:2000 |
| Antibodies | Mouse anti-GAPDH                          | AGOMA (AGM90111)                                          | 1:2000 |
| Antibodies | Rabbit anti-MYC                           | Cell Signal Technology (CST, #18583)                      | 1:2000 |
| Antibodies | Rabbit anti-HA                            | Cell Signal Technology (CST, #3724)                       | 1:2000 |
| Antibodies | Rabbit anti-PGC1 $\alpha$                 | Merck (ABE868-25UG)                                       | 1:2000 |
| Antibodies | Rabbit anti-PEPCK (H-300)                 | Santa Cruze (sc-32879)                                    | 1:2000 |
| Antibodies | Mouse anti-HIS (2A8)                      | Abmart (M20001)                                           | 1:2000 |
| Antibodies | Rabbit anti-GST (4C10)                    | Covance (MMS-112R)                                        | 1:2000 |
| Antibodies | Mouse anti- $\alpha$ -TUBULIN             | Abmart (T40103)                                           | 1:5000 |
| Antibodies | Mouse anti-ACTIN                          | Abmart (T40104)                                           | 1:5000 |
| Antibodies | Mouse anti-FLAG (M2)-HRP                  | SIGMA (AB592)                                             | 1:5000 |
| Antibodies | Rabbit anti-AKT                           | Cell Signal Technology (CST # 9272)                       | 1:2000 |
| Antibodies | Rabbit anti-Phospho-AKT-(Ser473)          | Cell Signal Technology (CST #9271)                        | 1:2000 |
| Plasmid    | 811- <i>Creb</i> -BD                      | human CREB fused with GAL4 BD domain (binding DNA domain) |        |
| Plasmid    | 804- <i>Crtc2</i> (S171A)-AD              | human CRTC2 fused with VP16 AD domain (active domain).    |        |
| Plasmid    | PM-BD- <i>Cbp</i> -KIX                    | KIX domain of CBP fused with BD (binding DNA domain)      |        |
| Plasmid    | VP-AD- <i>Creb</i> -KID                   | KID domain of CREB fused VP16 AD domain (active domain).  |        |
| Plasmid    | pGX5X-GST- <i>Creb</i>                    | human CREB fused N' terminal GST tag                      |        |
| Plasmid    | pET28C-HIS- <i>Crtc2</i> (S171A)          | human CRTC2 fused N' terminal HIS tag                     |        |
| Plasmid    | HA- <i>P300</i>                           | mouse P300 fused N' terminal HA tag                       |        |

|                            |                                 |                                                                   |  |
|----------------------------|---------------------------------|-------------------------------------------------------------------|--|
| Plasmid                    | <i>GFP-Crtc1</i>                | mouse CRTC1 fused N' terminal GFP                                 |  |
| Plasmid                    | <i>GFP-Crtc3</i>                | mouse CRTC1 fused N' terminal GFP                                 |  |
| Plasmid                    | <i>MYC-Creb</i>                 | human CREB fused N' terminal MYC tag                              |  |
| Plasmid                    | <i>FLAG-Crtc2</i>               | mouse CRTC2 fused N' terminal FLAG tag                            |  |
| Plasmid                    | <i>HA-Sec31A</i>                | mouse SEC31A fused N' terminal HA tag                             |  |
| AD-Virus                   | <i>AD-CRE-LUC</i>               | AD virus contain CRE driven luciferase reporter                   |  |
| AD-Virus                   | <i>AD-G6p-LUC</i>               | AD virus contain <i>G6p</i> promoter driven luciferase reporter   |  |
| AD-Virus                   | <i>AD-β-Gal</i>                 | AD virus contain RSV promoter driven β-gal reportet               |  |
| AD-Virus                   | <i>AD-HA-Crtc2</i>              | AD virus contains mouse CRTC2 fused with N' terminal HA tag       |  |
| Lenti-Virus                | <i>LV-Crtc2-FLAG-GFP</i>        | Lenti-virus contain CRTC2 fused C' FLAG tag, and co-expressed GFP |  |
| Peptides                   | glucagon, (1-29)                | GL Biochem (Shanghai) Ltd. (GLS52256)                             |  |
| inhibitor, chemical        | Metformin                       | SIGMA (PHR1084-500MG)                                             |  |
| inhibitor, chemical        | Tristatin, TSA                  | Selleck (S1045)                                                   |  |
| Critical commercial assays | GO assay,                       | SIGMA (GAGO20)                                                    |  |
| Critical commercial assays | LANCE Ultra cAMP Detection Kit  | Perkin Elmer (TRF0262)                                            |  |
| Critical commercial assays | SYBR Real-time PCR mix          | TAKARA (DRR041A)                                                  |  |
| Experimental animal Models | <i>db/db</i> mice, C57BL/6J     | The Jackson Laboratory                                            |  |
| Experimental animal Models | <i>Crtc2</i> -KO mice, C57BL/6J | Gift of Wangyiguo Laboratory                                      |  |
| Experimental animal Models | High fat diet induced mice      | Research Diet, 60% fat, D12492                                    |  |

|                   |                                                                             |                                                             |  |
|-------------------|-----------------------------------------------------------------------------|-------------------------------------------------------------|--|
| Oligo-nucleotides | qPCR primer as list                                                         |                                                             |  |
| Software          | Prism8.0                                                                    |                                                             |  |
| Software          | Origin 9.0                                                                  |                                                             |  |
| Software          | Quantity One                                                                |                                                             |  |
| Equipment         | ABI7900 Real-time PCR system                                                | ABI                                                         |  |
| Equipment         | CLAMS open-circuit indirect calorimetry                                     | Columbus Instruments                                        |  |
| Equipment         | Accu-Chek® Inform II system;                                                | Roche, Glucometer and strips                                |  |
| Equipment         | Nano Drop 2000                                                              | Thermo Fishe                                                |  |
| Equipment         | The minispec Live Mice Analyzer                                             | Nuclear magnetic resonance, NMR, Bruker, LF50               |  |
| Equipment         | Imaging System                                                              | Xenogen, IVIS-100                                           |  |
| Equipment         | EnVision Multimode Plate Reader                                             | Perkin/Elmer, EnVision 2105                                 |  |
| Equipment         | BIACORE 100                                                                 | GE Healthcare                                               |  |
| Equipment         | MicroCal iTC200 calorimeter                                                 | Freiburg, Germany                                           |  |
| Equipment         | Liquid chromatography-mass spectrometry/mass spectrometry (LC-MS/MS) system | Thermo Fisher                                               |  |
| Equipment         | WinNonLin professional version 4.1                                          | Pharsight Corp., Mountain View, CA                          |  |
| Equipment         | HNMR                                                                        | Varian-MERCURY Plus-400 or BRUKER BIOSPIN AG AVANCE III 500 |  |
| Equipment         | CNMR                                                                        | BRUKER BIOSPIN AG AVANCE III 500                            |  |
| Equipment         | HPLC                                                                        | Agilent 1260                                                |  |

1  
2

1 **Supplementary Table 4. The structure of CREB/CRTC2 inhibitors and their inhibitory activity.**

2

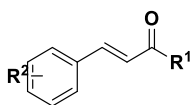

| Compd. | R <sup>1</sup> | R <sup>2</sup>    | IC <sub>50</sub> (μM) |
|--------|----------------|-------------------|-----------------------|
| A32    |                | 2-CF <sub>3</sub> | 9.95                  |
| A35    |                | 2-CF <sub>3</sub> | 53.3                  |
| A37    |                | 2-CF <sub>3</sub> | > 100                 |
| A40    | -OH            | 2-CF <sub>3</sub> | > 100                 |
| A43    | -OMe           | 2-CF <sub>3</sub> | 81.1                  |
| A47    |                | 3-CF <sub>3</sub> | 13.8                  |
| A50    |                | 4-CF <sub>3</sub> | 18.7                  |
| A53    |                | 2-OMe             | 3.1                   |
| A54    |                | 3-OMe             | 1.5                   |
| A56    |                | 4-OMe             | 39.7                  |
| A57    |                | 3-Ph              | 0.74                  |
| A58    |                | 3-Ph              | 73.5                  |
| A1101  |                | 3-Ph              | 3.56                  |
| APC    |                |                   | 27.4                  |

3
